# Fragmentation modes and the evolution of life cycles

Yuriy Pichugin<sup>1,\*</sup>, Jorge Peña<sup>1,2,+</sup>, Paul B. Rainey<sup>1,3,4</sup>, and Arne Traulsen<sup>1</sup>

\*Corresponding author: [pichugin@evolbio.mpg.de](mailto:pichugin@evolbio.mpg.de)

<sup>1</sup>Max Planck Institute for Evolutionary Biology, August-Thienemann-Str. 2, 24306 Plön,  
Germany

<sup>2</sup>GEOMAR Helmholtz Centre for Ocean Research Kiel, Evolutionary Ecology of Marine  
Fishes, Düsternbrooker Weg 20, 24105 Kiel, Germany

<sup>3</sup>Ecole Supérieure de Physique et de Chimie Industrielles de la Ville de Paris (ESPCI  
ParisTech), CNRS UMR 8231, PSL Research University, 75231 Paris Cedex 05, France

<sup>4</sup>New Zealand Institute for Advanced Study, Massey University, Private Bag 102904,  
Auckland 0745, New Zealand

<sup>+</sup>Current Address: Institute for Advanced Study in Toulouse, 21 allée de Brienne, 31015  
Toulouse Cedex 6, France

November 21, 2017

## Abstract

Reproduction is a defining feature of living systems. To reproduce, aggregates of biological units (e.g., multicellular organisms or colonial bacteria) must fragment into smaller parts. Fragmentation modes in nature range from binary fission in bacteria to collective-level fragmentation and the production of unicellular propagules in multicellular organisms. Despite this apparent ubiquity, the adaptive significance of fragmentation modes has received little attention. Here, we develop a model in which groups arise from the division of single cells that do not separate but stay together until the moment of group fragmentation. We allow for all possible fragmentation patterns and calculate the population growth rate of each associated life cycle. Fragmentation modes that maximise growth rate comprise a restrictive set of patterns that include production of unicellular propagules and division into two similar size groups. Life cycles marked by single-cell

26 bottlenecks maximise population growth rate under a wide range of conditions. This surprising  
27 result offers a new evolutionary explanation for the widespread occurrence of this mode of repro-  
28 duction. All in all, our model provides a framework for exploring the adaptive significance of  
29 fragmentation modes and their associated life cycles.

## 30 **Author Summary**

31 Mode of reproduction is a defining trait of all organisms, including colonial bacteria and multicellular  
32 organisms. To produce offspring, aggregates must fragment by splitting into two or more groups. The  
33 particular way that a given group fragments defines the life cycle of the organism. For instance, insect  
34 colonies can reproduce by splitting or by producing individuals that found new colonies. Similarly,  
35 some colonial bacteria propagate by fission or by releasing single cells, while others split in highly  
36 sophisticated ways; in multicellular organisms reproduction typically proceeds via a single cell bottle-  
37 neck phase. The space of possibilities for fragmentation is so vast that an exhaustive analysis seems  
38 daunting. Focusing on fragmentation modes of a simple kind we parametrise all possible modes of  
39 group fragmentation and identify those modes leading to the fastest population growth rate. Two kinds  
40 of life cycle dominate: one involving division into two equal size groups, and the other involving pro-  
41 duction of a unicellular propagule. The prevalence of these life cycles in nature is consistent with our  
42 null model and suggests that benefits accruing from population growth rate alone may have shaped  
43 the evolution of fragmentation mode.

## 44 **Introduction**

45 A requirement for evolution – and a defining feature of life – is reproduction [1, 2, 3, 4]. Perhaps the  
46 simplest mode of reproduction is binary fission in unicellular bacteria, whereby a single cell divides  
47 and produces two offspring cells. In more complex organisms, such as colonial bacteria, reproduction  
48 involves fragmentation of a group of cells into smaller groups. Bacterial species demonstrate a wide  
49 range of fragmentation modes, differing both in the size at which the parental group fragments and  
50 the number and sizes of offspring groups [5]. For example, in the bacterium *Neisseria*, a diplococcus,  
51 two daughter cells remain attached forming a two-celled group that separates into two groups of two  
52 cells only after a further round of cell division [6]. *Staphylococcus aureus*, another coccoid bacterium,

53 divides in three planes at right angles to one another to produce grape-like clusters of about 20 cells  
54 from which single cells separate to form new clusters [7]. Magnetotactic prokaryotes form spherical  
55 clusters of about 20 cells, which divide by splitting into two equally sized clusters [8].

56 These are just a few examples of a large number of diverse fragmentation modes, but why should  
57 there be such a wide range of life cycles? Do fragmentation modes have adaptive significance or are  
58 they simply the unintended consequences of particular cellular processes underpinning cell division?  
59 If adaptive, what selective forces shape their evolution? Can different life cycles simply provide  
60 different opportunities to maximise population growth rate?

61 A starting point to answer these questions is to consider benefits and costs of group living in cell  
62 collectives. Benefits may arise for various reasons. Cells within groups may be better able to withstand  
63 environmental stress [9], escape predation [10, 11], or occupy new niches [12, 13]. Also, via density-  
64 dependent gene regulation, cells within groups may gain more of a limiting resource than they would  
65 if alone [14, 15]. On the other hand, cells within groups experience increased competition and must  
66 also contend with the build up of potentially toxic waste metabolites [16, 17]. Thus, it is reasonable  
67 to expect an optimal relationship between group size and fragmentation mode that is environment and  
68 organism dependent [18, 19, 20, 21].

69 Here we formulate and study a matrix population model [22] that considers all possible modes  
70 of group fragmentation. By determining the relationship between life cycle and population growth  
71 rate, we show that there is, overall, a narrow class of optimal modes of fragmentation. When the  
72 process of fragmentation does not involve costs, optimal fragmentation modes are characterised by  
73 a deterministic schedule and binary splitting, whereby groups fragment into exactly two offspring  
74 groups. Contrastingly, when a cost is associated with fragmentation, it can be optimal for a group to  
75 fragment into multiple propagules.

76 Our results show that the range of life cycles observed in simple microbial populations are likely  
77 shaped by selection for intrinsic growth rate advantages inherent to different modes of group fragmen-  
78 tation. While we do not consider complex life cycles, our results can contribute to understanding the  
79 emergence of life cycles underpinning the evolution of multicellular life.

Table 1: List of variables

---

|                 |                                                              |
|-----------------|--------------------------------------------------------------|
| $X_i$           | a group of size $i$ cells                                    |
| $x_i$           | abundance of groups of size $i$                              |
| $\mathbf{x}$    | vector of abundances $x_i$                                   |
| $b_i$           | birth rate of cells in a group of $i$ cells                  |
| $d_i$           | death rates of groups of $i$ cells                           |
| $n$             | maximal group size                                           |
| $\zeta_i$       | the number of partitions of integer $i$                      |
| $\pi_i(\kappa)$ | the number of parts equal to $i$ in the partition $\kappa$   |
| $\mathbf{A}$    | projection matrix                                            |
| $\lambda_1$     | population growth rate                                       |
| $M$             | maximal benefit under monotonic fitness landscapes           |
| $\alpha$        | degree of complementarity under monotonic fitness landscapes |

---

## 80 **Methods**

### 81 **Group formation and fragmentation**

82 We consider a population in which a single type of cell (or unit or individual) can form groups (or  
83 complexes or aggregates) of increasing size by cells staying together after reproduction [18]. We  
84 assume that the size of any group is smaller than  $n$ , and denote groups of size  $i$  by  $X_i$  (see the list of  
85 used variables in Table 1). Groups die at rate  $d_i$  and cells within groups divide at rate  $b_i$ ; hence groups  
86 grow at rate  $ib_i$ . The vectors of birth rates  $\mathbf{b} = (b_1, \dots, b_{n-1})$  and of death rates  $\mathbf{d} = (d_1, \dots, d_{n-1})$   
87 make the costs and benefits associated to the size of the groups explicit, thus defining the “fitness  
88 landscape” of our model.

89 Groups produce new complexes by fragmenting (or splitting), i.e., by dividing into smaller groups.  
90 We further assume that fragmentation is triggered by growth of individual cells within a given group.  
91 Consider a group of size  $i$  growing into a group of size  $i + 1$ . Such a group can either stay together or  
92 fragment. If it fragments, it can do so in one of several ways. For example, a group of size 4 can give  
93 rise to the following five “fragmentation patterns”: 4 (the group does not split, but stays together), 3+1  
94 (the group splits into two offspring groups: one of size 3, and one of size 1), 2+2 (the group splits into

## A mixed life cycle

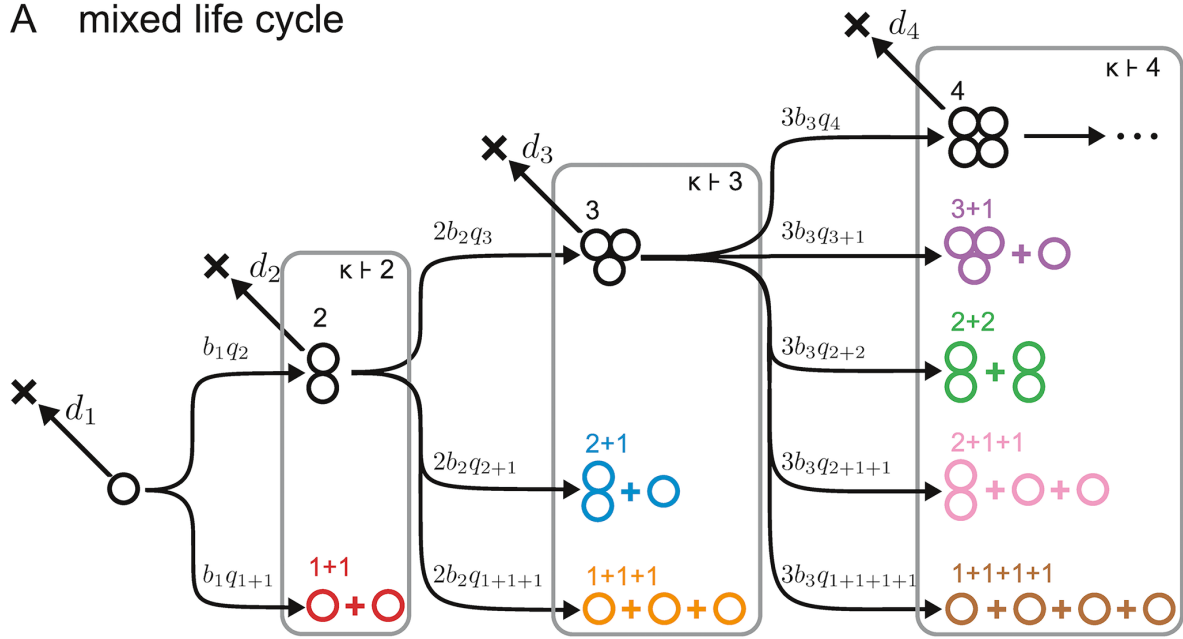

## B pure life cycle

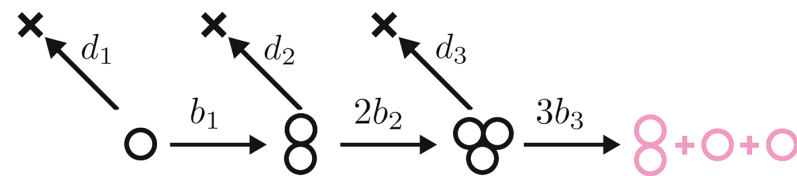

**Figure 1: Life cycles and fragmentation modes.** **A** Cells within groups of size  $i$  divide at rate  $b_i$ , hence groups grow at rate  $i b_i$ ; groups die at rate  $d_i$ . The sequences  $b_i$  and  $d_i$  define the fitness landscape of the model. We consider an exhaustive set of possible fragmentation modes, comprising both pure and mixed life cycles. In general, when growing from size  $i$  to size  $i + 1$ , groups stay together with probability  $q_i$ , or fragment according to fragmentation pattern  $\kappa$  with probability  $q_\kappa$ . Each fragmentation pattern (determining the number and size of offspring groups) can be identified with a partition of  $i + 1$ , i.e., a way of writing  $i + 1$  as a sum of positive integers, that we denote by  $\kappa \vdash i + 1$ . **B** Pure fragmentation modes are strategies with degenerate probability distributions over the set of partitions (so that  $q_\kappa = 1$  for exactly one fragmentation pattern, including staying together). Here we illustrate the pure fragmentation mode  $2 + 1 + 1$ , for which  $q_2 = q_3 = q_{2+1+1} = 1$ , and  $q_\kappa = 0$  for all other  $\kappa$ .

95 two groups of size 2),  $2+1+1$  (the group splits into one group of size 2 and two groups of size 1), and  
 96  $1+1+1+1$  (the group splits into four independent cells). Mathematically, such fragmentation patterns

97 correspond to the five partitions of 4 (a partition of a positive integer  $i$  is a way of writing  $i$  as a sum  
 98 of positive integers without regard to order; the summands are called parts [23]). We use the notation  
 99  $\kappa \vdash \ell$  to indicate that  $\kappa$  is a partition of  $\ell$ , for example  $2 + 2 \vdash 4$ . The number of partitions of  $\ell$  is  
 100 given by  $\zeta_\ell$ , e.g., there are  $\zeta_4 = 5$  partitions of 4.

101 We consider an exhaustive set of fragmentation modes (or “fragmentation strategies”) implement-  
 102 ing all possible ways groups of maximum size  $n$  can grow and fragment into smaller groups, including  
 103 both pure and mixed modes (Fig. 1). A pure fragmentation mode is characterised by a single partition  
 104  $\kappa \vdash \ell$ , i.e., groups of size  $i < \ell$  grow up to size  $\ell$  and then fragment according to partition  $\kappa \vdash \ell$ .  
 105 The partition  $\kappa$  can then be used to refer to the associated pure strategy. The total number of pure  
 106 fragmentation strategies is  $\sum_{\ell=2}^n (\zeta_\ell - 1)$ , which grows quickly with  $n$ : There are 128 pure fragmen-  
 107 tation modes for  $n = 10$ , but 1,295,920 for  $n = 50$ . A mixed fragmentation mode is given by a  
 108 probability distribution over the set of pure fragmentation modes. The relationship between pure and  
 109 mixed fragmentation modes is hence similar to the one between pure strategies and mixed strategies  
 110 in evolutionary game theory [24]. One of our main results is that mixed fragmentation modes are al-  
 111 ways dominated by pure fragmentation modes. Hence, we focus our exposition on pure fragmentation  
 112 modes, and leave the details of how to specify mixed fragmentation modes to Appendix A.

### 113 **Biological reactions and population dynamics**

114 Together with the fitness landscape given by the vectors of birth rates  $\mathbf{b}$  and death rates  $\mathbf{d}$ , each  
 115 fragmentation strategy specifies a set of biological reactions. Consider the pure mode  $\kappa \vdash \ell$ , whereby  
 116 groups grow up to size  $\ell$  and then split according to fragmentation pattern  $\kappa$ . A set of reactions

$$X_i \xrightarrow{d_i} 0, \quad i = 1, \dots, \ell - 1 \quad (1)$$

117 models the death of groups; an additional set of reactions

$$X_i \xrightarrow{ib_i} X_{i+1}, \quad i = 1, \dots, \ell - 2 \quad (2)$$

118 models the growth of groups (without splitting) up to size  $\ell - 1$ . Finally, one reaction of the type

$$X_{\ell-1} \xrightarrow{(\ell-1)b_{\ell-1}} \sum_{i=1}^{\ell-1} \pi_i(\kappa) X_i, \quad (3)$$

119 models the growth of the group from size  $\ell - 1$  to size  $\ell$  and its immediate fragmentation in a way  
 120 described by fragmentation pattern  $\kappa \vdash \ell$ , where parts equal to  $i$  appear a number  $\pi_i(\kappa)$  of times. For

121 instance, for the pure fragmentation mode  $2 + 1 + 1 \rightarrow 4$ , Eq. (3) becomes

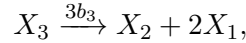

122 which stipulates that groups of size 3 grow to size 4 at rate  $3b_3$  and split into one group of size 2 and

123 two groups of size 1; here,  $\pi_1(2 + 1 + 1) = 2$ ,  $\pi_2(2 + 1 + 1) = 1$ ,  $\pi_3(2 + 1 + 1) = 0$ .

The sets of reactions (1), (2), and (3) give rise to the system of differential equations

$$\dot{x}_1 = -(b_1 + d_1)x_1 + (\ell - 1)b_{\ell-1}\pi_1(\kappa)x_{\ell-1},$$

$$\dot{x}_i = (i - 1)b_{i-1}x_{i-1} - (ib_i + d_i)x_i + (\ell - 1)b_{\ell-1}\pi_i(\kappa)x_{\ell-1}, \quad i = 2, \dots, \ell - 1$$

124 where  $x_i$  denotes the abundance of groups of size  $i$ . This is a linear system that can be represented in

125 matrix form as

$$\dot{\mathbf{x}} = \mathbf{A}\mathbf{x}, \quad (4)$$

126 where  $\mathbf{x} = (x_1, x_2, \dots, x_{\ell-1})$  is the vector of abundances of the groups of different size and

$$\mathbf{A} = \begin{pmatrix} -b_1 - d_1 & 0 & \cdots & 0 & (\ell - 1)b_{\ell-1}\pi_1(\kappa) \\ b_1 & -2b_2 - d_2 & 0 & \vdots & (\ell - 1)b_{\ell-1}\pi_2(\kappa) \\ 0 & 2b_2 & -3b_3 - d_3 & 0 & (\ell - 1)b_{\ell-1}\pi_3(\kappa) \\ 0 & 0 & \ddots & \ddots & \vdots \\ 0 & 0 & \cdots & (\ell - 2)b_{\ell-2} & (\ell - 1)b_{\ell-1}(\pi_{\ell-1}(\kappa) - 1) - d_{\ell-1} \end{pmatrix}$$

127 is the projection matrix determining the population dynamics.

## 128 Population growth rate

129 For any fragmentation mode and any fitness landscape, the projection matrix  $\mathbf{A}$  is “essentially non-

130 negative” (or quasi-positive), i.e., all the elements outside the main diagonal are non-negative [25].

131 This implies that  $\mathbf{A}$  has a real leading eigenvalue  $\lambda_1$  with associated non-negative left and right eigen-

132 vectors  $\mathbf{v}$  and  $\mathbf{w}$ . In the long term, the solution of Eq. (4) converges to that of an exponentially growing

133 population with a stable distribution, i.e.,

$$\lim_{t \rightarrow \infty} \mathbf{x}(t) = e^{\lambda_1 t} \mathbf{w}.$$

134 The leading eigenvalue  $\lambda_1$  hence gives the total population growth rate in the long term, and its asso-

135 ciated right eigenvector  $\mathbf{w} = (w_1, \dots, w_{m-1})$  gives the stable distribution of group sizes so that, in

136 the long term, the fraction  $x_i$  of complexes of size  $i$  in the population is proportional to  $w_i$ .

## 137 **Dominance and optimality**

138 For a given fitness landscape  $\{\mathbf{b}, \mathbf{d}\}$ , we can take the leading eigenvalue  $\lambda_1(\kappa; \mathbf{b}, \mathbf{d})$  as a measure of  
139 fitness of fragmentation mode  $\kappa$ , and consider the competition between two different fragmentation  
140 modes,  $\kappa_1$  and  $\kappa_2$ . Indeed, under the assumption of no density limitation, the evolutionary dynamics  
141 are described by two uncoupled sets of differential equations of the form (4): one set for  $\kappa_1$  and one  
142 set for  $\kappa_2$ . In the long term,  $\kappa_1$  is not outcompeted by  $\kappa_2$  if  $\lambda_1(\kappa_1; \mathbf{b}, \mathbf{d}) \geq \lambda_1(\kappa_2; \mathbf{b}, \mathbf{d})$ ; we then say  
143 that fragmentation mode  $\kappa_1$  dominates fragmentation mode  $\kappa_2$ . We also say that strategy  $\kappa_i$  is optimal  
144 for given birth rates  $\mathbf{b}$  and death rates  $\mathbf{d}$  if it achieves the largest growth rate among all possible  
145 fragmentation modes.

## 146 **Two classes of fitness landscape: fecundity landscapes and survival landscapes**

147 Fitness landscapes capture the many advantages or disadvantages associated with group living. These  
148 advantages may come either in the form of additional resources available to groups depending on their  
149 size or as an improved protection from external hazards. For our numerical examples, we consider  
150 two classes of fitness landscape, each representing only one of these factors. In the first class, that we  
151 call “fecundity landscapes”, group size affects only the birth rates of cells (while we impose  $d_i = 0$   
152 for all  $i$ ). In the second class, that we call “survival landscapes”, group size affects only death rates  
153 (and we impose  $b_i = 1$  for all  $i$ ).

## 154 **Examples for $n = 3$**

155 To fix ideas, consider all pure fragmentation modes with a maximum group size  $n = 3$ . These are 1+1  
156 (“binary fission”, a partition of 2), 2+1 (“unicellular propagule”, a partition of 3), and 1+1+1 (“ternary  
157 fission” a partition of 3). The three associated projection matrices are given by

$$\mathbf{A}^{1+1} = \begin{pmatrix} b_1 - d_1 \end{pmatrix}, \mathbf{A}^{2+1} = \begin{pmatrix} -b_1 - d_1 & 2b_2 \\ b_1 & -d_2 \end{pmatrix}, \mathbf{A}^{1+1+1} = \begin{pmatrix} -b_1 - d_1 & 6b_2 \\ b_1 & -2b_2 - d_2 \end{pmatrix}.$$



158 The three growth rates are

$$\lambda_1^{1+1} = b_1 - d_1, \quad (5a)$$

$$\lambda_1^{2+1} = \frac{-(b_1 + d_1 + d_2) + \sqrt{(b_1 + d_1 - d_2)^2 + 8b_1b_2}}{2}, \quad (5b)$$

$$\lambda_1^{1+1+1} = \frac{-(b_1 + 2b_2 + d_1 + d_2) + \sqrt{b_1^2 + 2b_1(10b_2 + d_1 - d_2) + (2b_2 - d_1 + d_2)^2}}{2}. \quad (5c)$$

159 In the particular case of a fecundity landscape given by  $b_1 = 1$  and  $b_2 = 15/8$  (and  $d_1 = d_2 = 0$ ), these  
 160 growth rates reduce to  $\lambda_1^{1+1} = 1$ ,  $\lambda_1^{2+1} = 3/2$  and  $\lambda_1^{1+1+1} = 5/4$ , and we have  $\lambda_1^{2+1} > \lambda_1^{1+1+1} >$   
 161  $\lambda_1^{1+1}$ . We then say that ternary and binary fission are dominated by the unicellular propagule strategy.

## 162 Results

### 163 Mixed fragmentation modes are dominated

164 Although for simplicity we focus our exposition on pure fragmentation strategies, we also consider  
 165 mixed fragmentation strategies, i.e., probabilistic strategies mixing between different pure modes. A  
 166 natural question to ask is whether a mixed fragmentation mode can achieve a larger growth rate than  
 167 a pure mode. We find that the answer is no. For any fitness landscape and any maximum group size  
 168  $n$ , mixed fragmentation modes are dominated by a pure fragmentation mode (see Appendix B). Thus,  
 169 the optimal fragmentation mode for any fitness landscape is pure.

170 As an example, consider fragmentation modes 1+1 and 2+1, and a mixed fragmentation mode  
 171 mixing between these two so that with probability  $q$  splitting follows fragmentation pattern 2+1 and  
 172 with probability  $1 - q$  it follows fragmentation pattern 1+1. For any mixing probability  $q$  and any  
 173 fitness landscape, the growth rate of the mixed fragmentation mode is given by

$$\lambda_1^q = \frac{b_1(1 - 2q) - (d_1 + d_2) + \sqrt{(d_1 + d_2 - (1 - 2q)b_1)^2 + 4b_1(2qb_2 + (1 - 2q)d_2)}}{2},$$

174 which can be shown to always lie between the growth rates of the pure fragmentation modes, i.e., either  
 175  $\lambda_1^{1+1} \leq \lambda_1^q \leq \lambda_1^{2+1}$  or  $\lambda_1^{2+1} \leq \lambda_1^q \leq \lambda_1^{1+1}$  holds and the mixed fragmentation mode is dominated (see  
 176 Appendix C).

177 To further illustrate our analytical findings, consider groups of maximum size  $n = 4$  and a fe-  
 178 cundity landscape given by  $\mathbf{b} = (1, 2, 1.4)$ . We randomly generated  $10^7$  mixed fragmentation modes  
 179 by drawing the probabilities for growth without splitting from an uniform distribution and letting the

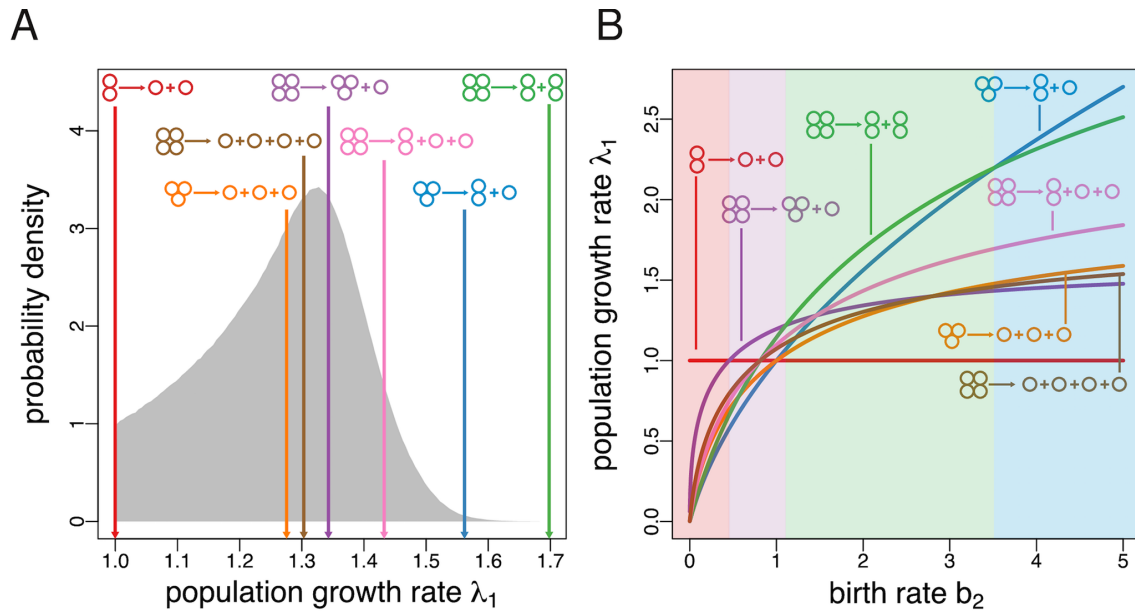

**Figure 2: The optimal fragmentation mode is pure and characterised by binary fragmentation.**

**A** Mixed fragmentation strategies are dominated. Here we show the empirical probability distribution of the growth rate of mixed fragmentation modes for  $n = 4$  (generated from a sample of  $10^7$  randomly generated fragmentation modes) subject to the fitness landscape  $\{\mathbf{b}, \mathbf{d}\} = \{(1, 2, 1.4), (0, 0, 0)\}$ . The growth rates of all seven pure fragmentation modes for  $n = 4$  are indicated by arrows. In this case, 2+2 achieves the maximal possible growth rate among all possible fragmentation modes. **B** Optimal fragmentation modes are characterised by binary splitting. Population growth rate ( $\lambda_1$ ) for all seven pure fragmentation modes for  $n = 4$  subject to the fitness landscape  $\{\mathbf{b}, \mathbf{d}\} = \{(1, b_2, 1.4), (0, 0, 0)\}$  as a function of the birth rate of groups of size 2,  $b_2$ . Each of the four fragmentation modes characterised by binary fragmentation (1+1, 2+1, 2+2, and 3+1) can be optimal depending on the value of  $b_2$ . Contrastingly, nonbinary fragmentation modes (1+1+1, 1+1+1+1, and 2+1+1) are never optimal.

180 probabilities of splitting according to a given fragmentation pattern be proportional to exponential  
 181 random variables with rate parameter equal to one. We then calculated the growth rate of these mixed  
 182 strategies together with the growth rate of the seven pure fragmentation modes available for  $n = 4$ ,  
 183 i.e., 1+1, 2+1, 1+1+1, 3+1, 2+2, 2+1+1, and 1+1+1+1 (Fig. 2A). In line with our analysis, a pure  
 184 fragmentation mode (namely 2+2, whereby groups grow up to size 4 and then immediately split into  
 185 two bicellular groups) achieves a higher growth rate than the growth rate of any mixed fragmentation  
 186 mode, and the highest growth rate overall.

## 187 **Optimal fragmentation modes are characterised by binary splitting**

188 Having shown that mixed fragmentation modes are dominated, we now ask which pure modes might  
189 be optimal. We find that, within the set of pure modes, “binary” fragmentation modes (whereby  
190 groups split into exactly two offspring groups) dominate “nonbinary” fragmentation modes (whereby  
191 groups split into more than two offspring groups). To illustrate this result, consider the simplest case  
192 of  $n = 3$  and the three modes 1+1, 2+1, and 1+1+1, out of which 1+1 and 2+1 are binary, and 1+1+1  
193 is nonbinary. Comparing their growth rates (as given in Eq. (5)), we find that  $\lambda_1^{1+1} \geq \lambda_1^{1+1+1}$  holds if  
194  $b_1 - b_2 \geq d_1 - d_2$  and that  $\lambda_1^{2+1} \geq \lambda_1^{1+1+1}$  holds if  $b_1 - b_2 \leq d_1 - d_2$ . Thus, for any fitness landscape,  
195 1+1+1 is dominated by either 2+1 or by 1+1. More generally, we can show that for any nonbinary  
196 fragmentation mode, one can always find a binary fragmentation mode achieving a greater or equal  
197 growth rate under any maximum group size  $n$  and fitness landscape (see Appendices D and E). Taken  
198 together, our analytical results imply that the set of optimal fragmentation modes is countable and,  
199 even for large  $n$ , relatively small. Consider the proportion of pure fragmentation modes that can be  
200 optimal, which is defined by the ratio between the number of binary fragmentation modes and the total  
201 number of pure fragmentation modes. While this ratio is relatively high for small  $n$  (e.g.,  $2/3 \approx 0.67$   
202 for  $n = 3$  or  $4/7 \approx 0.57$  for  $n = 4$ ), it decreases sharply with increasing  $n$  (e.g.,  $25/128 \approx 0.20$  for  
203  $n = 10$  and  $625/1295920 \approx 0.00048$  for  $n = 50$ ).

204 Fig. 2B shows the growth rate of the seven pure modes for  $n = 4$  for a fecundity landscape given  
205 by  $\mathbf{b} = (1, b_2, 1.4)$  as a function of  $b_2$ . In line with our analysis, only binary fragmentation modes  
206 (1+1, 2+1, 2+2, and 3+1) can be optimal, while nonbinary fragmentation modes (1+1+1, 2+1+1, and  
207 1+1+1+1) are dominated. Which particular binary mode is optimal depends on the particular value  
208 of the birth rate of groups of two cells. For small values ( $b_2 \lesssim 0.45$ ), the fecundity of such groups  
209 is too low, and the optimal fragmentation mode is 1+1. For intermediary values ( $0.45 \lesssim b_2 \lesssim 1.11$ ),  
210 the reproduction efficiency of groups of three cells mitigates the inefficiency of cell pairs, and the  
211 mode 3+1 becomes optimal. For larger values ( $1.11 \lesssim b_2 \lesssim 3.52$ ), the optimal fragmentation mode  
212 is 2+2, where no single cells are produced. Finally, for very large values ( $b_2 \gtrsim 3.52$ ), the optimal  
213 fragmentation mode is 2+1; this ensures that one offspring group emerges at the most productive  
214 bicellular state.

215 More generally, which particular fragmentation mode within the class of binary splitting strate-  
216 gies is optimal depends on all birth rates and death rates characterising the fitness landscape. To

217 further explore this issue, we identified the optimal fragmentation modes for general fecundity and  
218 survival landscapes for the simple case of  $n = 4$  (Fig. 3; Appendix F). Since we can set  $b_1 = 1$  and  
219  $\min(\mathbf{d}) = 0$  without loss of generality (see Appendix D), we represent fitness landscapes as points  
220 in a two-dimensional parameter space with coordinates  $b_2/b_1$  and  $b_3/b_1$  for fecundity landscapes, and  
221 coordinates  $d_2 - d_1$  and  $d_3 - d_1$  for survival landscapes. The exact boundaries of the parameter regions  
222 where a given fragmentation mode is optimal are often nontrivial mathematical expressions. Never-  
223 theless, we identify general patterns dictating which fragmentation mode will be optimal. Consider  
224 first the optimality map for fecundity landscapes (Fig. 3A). A sufficient condition for the unicellular  
225 life cycle 1+1 to be optimal is that the birth rate of single cells is larger than the birth rate of pairs and  
226 triplets of cells ( $b_1 > b_2$  and  $b_1 > b_3$ ). In this case, there is no apparent reason why a fragmentation  
227 mode different than 1+1 would be optimal. Perhaps less trivially, 1+1 can also be optimal in cases  
228 where single cells are less fertile than groups of three cells, i.e., even if  $b_1 < b_3$  holds. This requires  
229 the birth rate  $b_2$  to be so small that the fecundity benefits accrued when reaching the size of three cells  
230 are not enough to compensate for the unavoidable penalty of passing through the less prolific state of  
231 two cells. Turning now to fragmentation mode 2+1, a necessary condition for this mode to be optimal  
232 is that pairs of cells have the largest birth rate, i.e., that  $b_2 > b_1$  and  $b_2 > b_3$  holds. Similarly, mode  
233 3+1 can only be optimal if  $b_3 > b_1$  and  $b_3 > b_2$ , so that groups of three have the largest birth rate. In  
234 these two cases, the optimal fragmentation mode (either 2+1 or 3+1) keeps one of the two offspring  
235 groups at the most productive size. Finally, for fragmentation mode 2+2 to be optimal, it is necessary  
236 that single cells have the lowest birth rate, i.e., that  $b_2 > b_1$  and  $b_3 > b_1$  holds. In this case, the  
237 fragmentation mode ensures that the life cycle of the organism never goes through the least produc-  
238 tive unicellular phase. Under survival landscapes, fitness increases as death rates decrease. Taking this  
239 qualitative difference into account, the map of optimal fragmentation modes under survival landscapes  
240 (Fig. 3B) follows similar qualitative patterns as the one under fecundity landscapes.

### 241 **Costly fragmentation allows for optimal nonbinary fragmentation and multicellularity** 242 **without group benefits**

243 So far we have assumed that fragmentation is costless. However, fragmentation processes can be costly  
244 to the parental group undergoing division. This is particularly apparent in cases where some cells need  
245 to die in order for fragmentation of the group to take place. Examples in simple multicellular forms

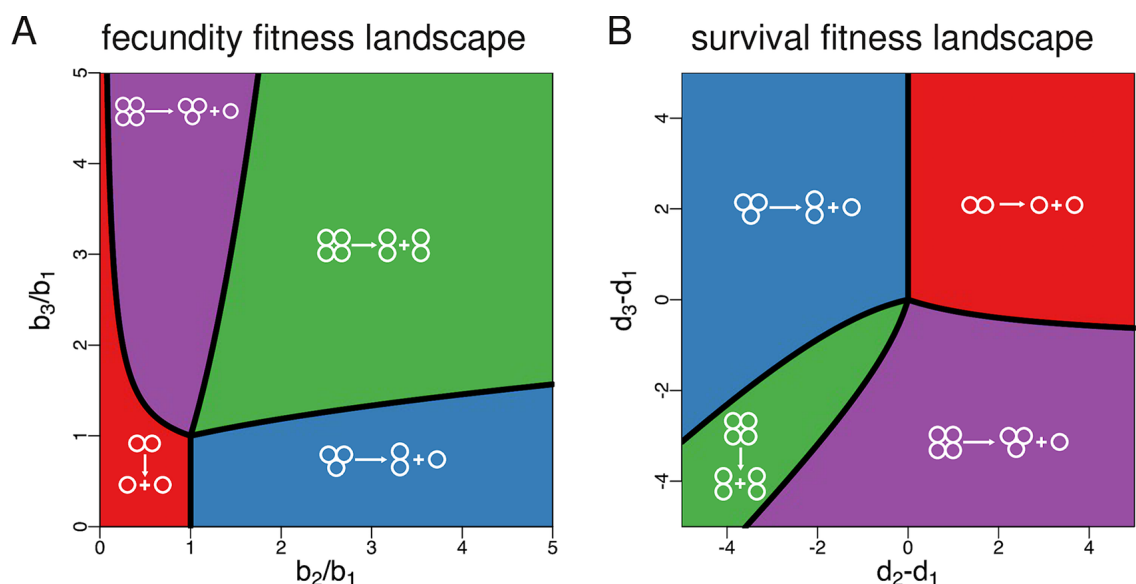

Figure 3: **Optimal fragmentation modes for fecundity and survival landscapes (costless fragmentation).** **A** Life cycles achieving the maximum population growth rate for  $n = 4$  under fecundity landscapes (i.e.,  $d_1 = d_2 = d_3 = 0$ ). In this scenario, fragmentation mode 2+2 is optimal for most fitness landscapes. **B** Life cycles achieving the maximum population growth rate for  $n = 4$  under survival landscapes (i.e.,  $b_1 = b_2 = b_3 = 1$ ). In this scenario, fragmentation modes emitting a unicellular propagule (1+1, 2+1, 3+1) are optimal for most parameter values. We use ratios of birth rates and differences between death rates as axes because one can consider  $b_1 = 1$  and  $\min(d_1, d_2, d_3) = 0$  without loss of generality (see Appendix D). Shaded areas are obtained from the direct comparison of numerical solutions, lines are found analytically (see Appendix F).

246 include *Volvox*, where somatic cells constituting the outer layer of the group die upon releasing the  
 247 offspring colonies and are not passed to the next generation [26], the breaking of filaments in colonial  
 248 cyanobacteria [27], and the fragmentation of “snowflake-like” clusters of the yeast *Saccharomyces*  
 249 *cerevisiae* [28]. Fragmentation costs may also be less apparent. For instance, fragmentation may cost  
 250 resources that would otherwise be available for the growth of cells within a group.

251 To investigate the effect of fragmentation costs on the set of optimal fragmentation modes, we  
 252 consider two cases: proportional costs and fixed costs. For proportional costs, we assume that  $\pi - 1$   
 253 cells die in the process of a group fragmenting into  $\pi$  parts. This case captures the fragmentation  
 254 process of filamentous bacteria, where filament breakage entails the death of cells connecting the

255 newly formed fragments [27]. For fixed costs, we assume that exactly one cell is lost upon each  
256 fragmentation event. This scenario is loosely inspired by yeast colonies with a tree-like structure,  
257 where cells can be connected with many other cells, so the death of a single cell may release more  
258 than two offspring colonies [28, 19]. Mathematically, both cases imply that fragmentation patterns are  
259 described by partitions of a number smaller than the size of the parent group (see Appendix G).

260 For both kinds of costly fragmentation, we can show that mixed fragmentation modes are still  
261 dominated by pure fragmentation modes (the proof given in Appendix B also holds in this case).  
262 Moreover, for proportional costs the optimal fragmentation mode is also characterised by binary frag-  
263 mentation, as it is the case for costless fragmentation (see Appendix H). This makes intuitive sense, as  
264 the addition of a penalty for splitting into many fragments should further reinforce the optimality of  
265 binary splitting (whereby only one cell per fragmentation event is lost). In contrast, we find that under  
266 fragmentation with fixed costs the optimal fragmentation mode can involve nonbinary fragmentation,  
267 i.e., division into more than two offspring groups. This result can be readily illustrated for the case of  
268  $n = 4$  where the nonbinary mode 1+1+1 is optimal for a wide range of fitness landscapes (Fig. 4).

269 Another interesting feature of costly fragmentation (implemented via either proportional or fixed  
270 costs) is that fragmentation modes involving the emergence of large groups can be optimal even if  
271 being in a group does not grant any fecundity or survival advantage to cells. If fragmentation is cost-  
272 less, as we assumed before, fitness landscapes for which groups perform worse than unicells (that is,  
273  $b_i/b_1 \leq 1$  for fecundity landscapes or  $d_i - d_1 \geq 0$  for survival landscapes) lead to optimal fragmenta-  
274 tion modes where splitting occurs at the minimum possible group size  $i = 2$ , so that no multicellular  
275 groups emerge in the population (cf. Fig. 3). In contrast, under costly fragmentation some of these  
276 fitness landscapes allow for the evolutionary optimality of fragmentation modes according to which  
277 groups split at the maximum size  $n = 4$  (2+1 under proportional costs, and 1+1+1 under fixed costs),  
278 and hence for life cycles where multicellular phases are persistent. This seems paradoxical until one  
279 realises that by staying together as long as possible groups delay as much as possible the inevitable  
280 cell loss associated to a fragmentation event. Thus, even if groups are less fecund or die at a higher  
281 rate than independent cells, staying together might be adaptive if splitting apart is too costly.

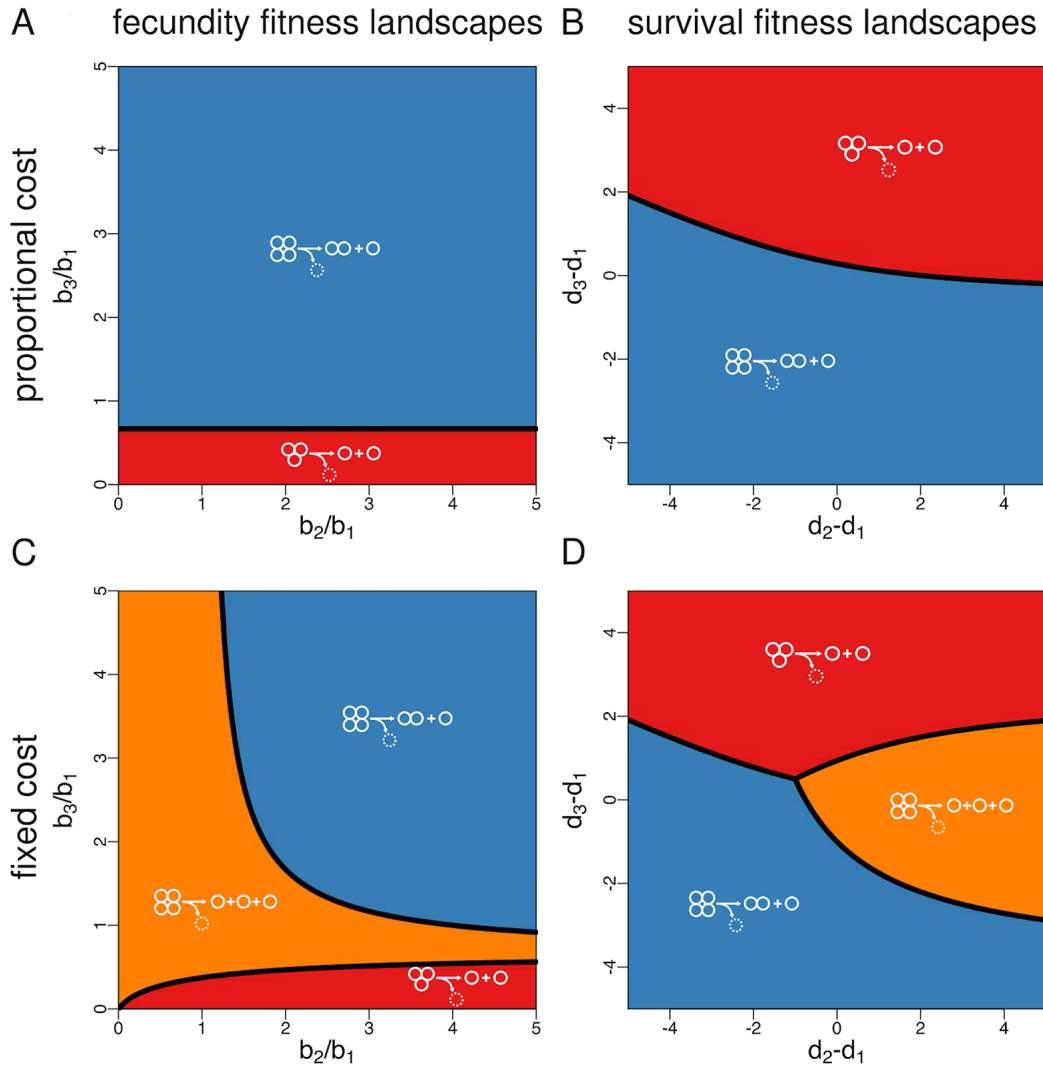

Figure 4: **Optimal fragmentation modes for fecundity and survival landscapes (costly fragmentation).** For proportional costs (panels **A** and **B**), splitting into  $\pi$  parts involves the loss of  $\pi - 1$  cells. In this case, and for  $n = 4$ , only two pure modes are possible: 2+1 (whereby a 4-unit group splits into a pair of cells and a single cell and loses one cell) and 1+1 (whereby a group of three splits into two single cells and loses one cell). For fixed costs (panels **C** and **D**), splitting involves the loss of a single cell, no matter the kind of partition. In this case, and for  $n = 4$ , an additional mode is possible: 1+1+1 (whereby a 4-unit group splits into three single cells and loses one cell). This last nonbinary mode can be optimal under a wide range of parameters.

282 **Synergistic interactions between cells promote the production of unicellular propagules,**  
 283 **while diminishing returns promote equal binary fragmentation**

284 Next, we focus on fitness landscapes for which either the birth rate of cells increases with group size  
 15  
 285 (fecundity landscapes where larger groups are always more productive) or the death rate of groups



286 decreases with group size (survival landscapes where larger groups always live longer). In this case,  
287 and for a maximum group size  $n = 4$ , the set of optimal modes is given by 2+2 and 3+1 if there  
288 are no fragmentation costs (Fig. 3), by 2+1 if fragmentation costs are proportional to the number of  
289 fragments (Fig. 3A-B), and by 2+1 and 1+1+1 if fragmentation involves a fixed cost of one cell (Fig.  
290 4C-D).

291 To investigate larger maximum group sizes  $n$  in a simple but systematic way, we consider fecundity  
292 landscapes with birth rates given by  $b_i = 1 + Mg_i$  and survival landscapes with death rates given by  
293  $d_i = M(1 - g_i)$ , where  $g_i = [(i - 1)/(n - 2)]^\alpha$  [29] models the fecundity or survival benefits  
294 associated to group size  $i$  and  $M > 0$  is the maximum benefit (Fig. 5). The parameter  $\alpha$  is the degree  
295 of complementarity between cells; it measures how important the addition of another cell to the group  
296 is in producing the maximum possible benefit  $M$  [30]. For low degrees of complementarity ( $\alpha < 1$ ),  
297 the sequence  $g_i$  is strictly concave and each additional cell contributes less to the per capita benefit of  
298 group living [31] and groups of all sizes achieve the same functionality as  $\alpha$  tends to zero. If  $\alpha = 1$ ,  
299 the sequence  $g_i$  is linear, and each additional cell contributes equally to the fecundity or survival of the  
300 group. Finally, for high degrees of complementarity ( $\alpha > 1$ ), the sequence  $g_i$  is strictly convex and  
301 each additional cell improves the performance of the group more than the previous cell did. In the limit  
302 of large  $\alpha$ , the advantages of group living materialise only when complexes achieve the maximum size  
303  $n - 1$  [31].

304 We numerically calculate the optimal fragmentation modes for  $n = 20$  (costless fragmentation) or  
305  $n = 21$  (costly fragmentation) and the fitness landscapes described above for parameter values taken  
306 from  $0.01 \leq \alpha \leq 100$  and  $0.02 \leq M \leq 50$  (Figs. 6 and 7). In line with our general analytical  
307 results, optimal fragmentation modes are always characterised by binary splitting when fragmentation  
308 is costless or when it involves proportional costs, while nonbinary splitting can be optimal only if  
309 fragmentation involves a fixed cost. We also find that, for each value of  $\alpha$  and  $M$ , and for both  
310 costless and costly fragmentation, the optimal fragmentation mode is one where fragmentation occurs  
311 at the largest possible size. This is expected since the benefit sequence is increasing in group size  
312 and thus groups of maximum size perform better, either by achieving the largest birth rate per unit  
313 (fecundity landscapes) or the lowest death rate (survival landscapes). Which particular fragmentation  
314 mode maximizes the growth rate depends nontrivially on whether fragmentation is costless or costly  
315 (and in the latter case also on how such costs are implemented), on the kind of group size benefits



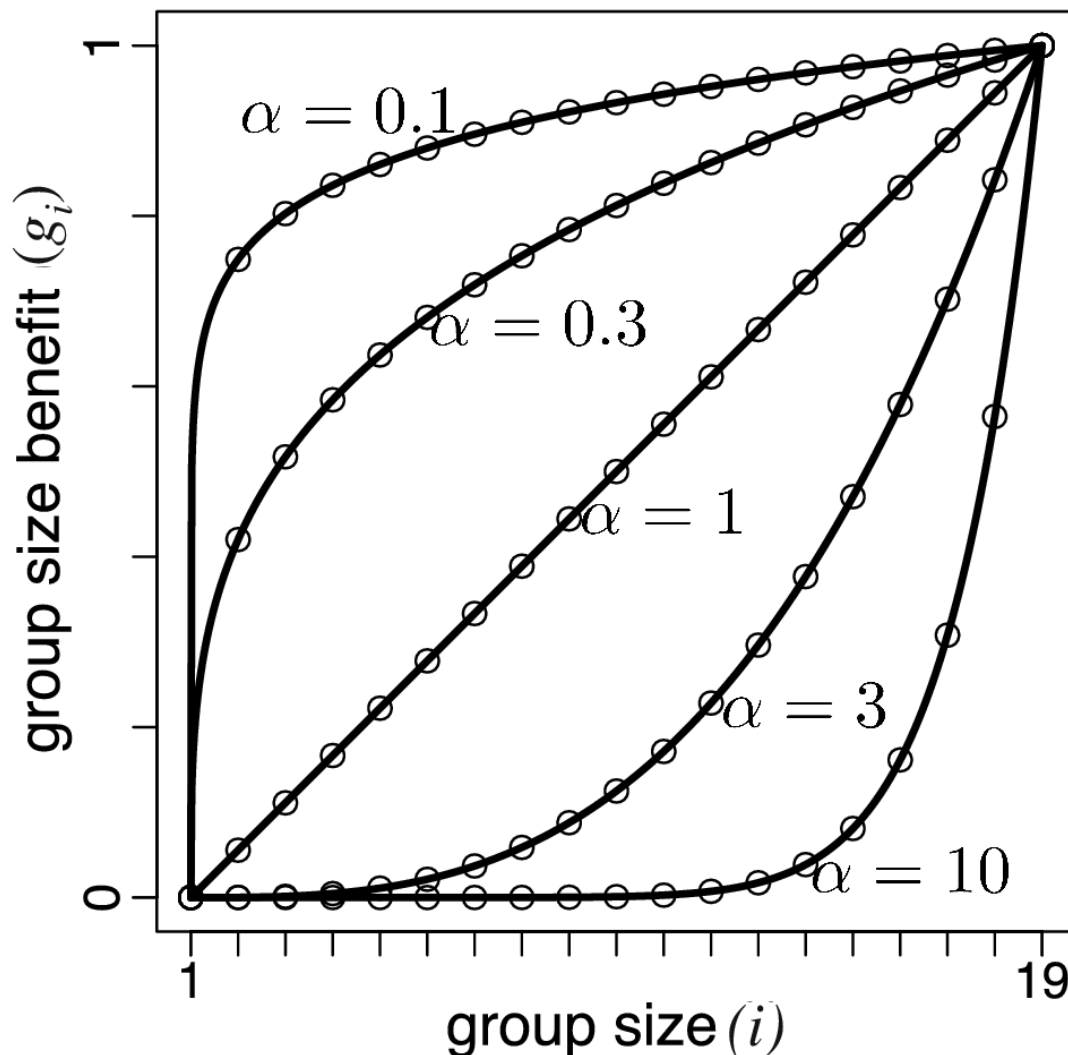

Figure 5: **Advantages of group living.** Group size benefit  $g_i = [(i - 1)/(n - 2)]^\alpha$  as a function of group size for different values of the degree of complementarity  $\alpha$ . If  $\alpha < 1$ ,  $g_i$  is concave; if  $\alpha = 1$ ,  $g_i$  is linear; if  $\alpha > 1$ ,  $g_i$  is convex.

316 (fecundity or survival), on the maximum possible benefit  $M$ , and on the degree of complementarity  
 317  $\alpha$ . Despite this apparent complexity, some general patterns can be identified.

318 Let us focus on the case of fecundity landscapes and first fasten attention on the scenario of costless  
 319 fragmentation (Fig. 6A). A salient feature of this case is the prominence of two qualitatively different  
 320 fragmentation modes: the “equal binary fragmentation” strategy 10+10 (whereby offspring groups

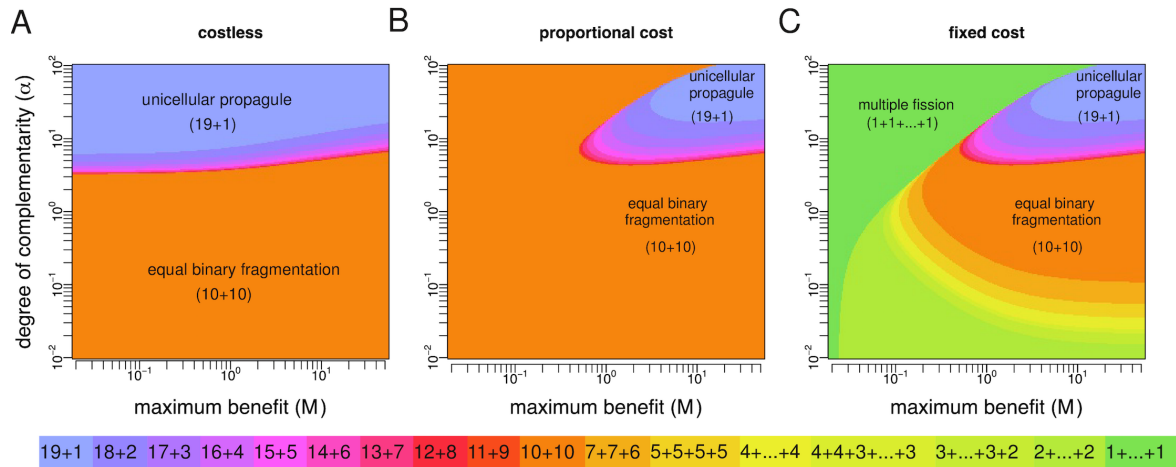

Figure 6: **Optimal life cycles under monotonic fecundity landscapes.** Birth rates are given by  $b_i = 1 + Mg_i$  where  $g_i = [(i - 1)/(n - 2)]^\alpha$ . **A** Costless fragmentation,  $n = 20$ . **B** Fragmentation with proportional costs,  $n = 21$ . **C** Fragmentation with fixed costs,  $n = 21$ . For costless fragmentation and fragmentation with proportional costs, only binary modes 19+1, 18+2,..., 10+10 are optimal. In these cases, diminishing returns ( $\alpha < 1$ ) make equal binary fragmentation (10+10) optimal. Also, optimality of the unicellular propagule strategy (19+1) requires increasing returns ( $\alpha > 1$ ). For fragmentation with fixed costs, nonbinary modes 7+7+6,...,1+...+1 can also be optimal.

321 have sizes as similar as possible) and the “unicellular propagule” strategy 19+1 (whereby offspring  
 322 groups have sizes as different as possible). A sufficient condition for equal binary fragmentation to  
 323 be optimal is that increase in size is characterised by diminishing returns. The intuition behind this  
 324 result is that, if the degree of complementarity is small, then groups (complexes of size  $i \geq 2$ ) have  
 325 similar performance, while independent cells ( $i = 1$ ) are at a significant disadvantage. Therefore, the  
 326 optimal strategy is to ensure that both offspring groups are as large as possible, and hence of the same  
 327 size. However, equal binary fragmentation can be also optimal for synergistic interactions, provided  
 328 that complementarity is not too high. In contrast, the unicellular propagule strategy is optimal only  
 329 for relatively high degrees of complementarity. This is because when complementarity is high only  
 330 the largest group can reap the benefits of group living; in this case, the optimal mode is to have at  
 331 least one offspring of very large size. Compared to 19+1 and 10+10, other binary splitting strategies  
 332 are optimal in smaller regions of the parameter space, and in all cases only for synergistic interactions  
 333 between cells.

334 Consider now the effects of introducing fragmentation costs proportional to the number of frag-  
335 ments (Fig. 6B). Here, the region where the unicellular propagule strategy is optimal shrinks to the  
336 corner of the parameter space where benefits of group living and degree of complementarity are max-  
337 imum, while the region of optimality for equal binary fragmentation expands. This makes intuitive  
338 sense. With fragmentation costs, the largest offspring group resulting from fragmenting according  
339 to the unicellular propagule strategy is of size 19, and hence always on the brink of fragmentation  
340 (once it grows to size 21) and incurring one cell loss. When group benefits are not high and syner-  
341 gistic enough, the unicellular propagule strategy is dominated by fragmentation modes (in particular,  
342 equal binary fragmentation) having smaller offspring for which the costs of fragmentation are not so  
343 immediate.

344 Finally, if costs of fragmentation are not proportional but fixed (Fig. 6C), then two classes of  
345 nonbinary splitting become optimal in regions of the parameter space where equal binary fragmenta-  
346 tion was optimal under proportional costs: (i) “multiple fission” ( $1+1+\dots+1$ ) which is in general fa-  
347 vored for small maximum benefit and increasing returns, and (ii) “multiple groups” (modes  $2+2+\dots+2$ ,  
348  $3+3+3+3+3+3+2$ ,  $4+4+3+3+3+3$ ,  $4+4+4+4+4$ ,  $5+5+5+5$ , and  $7+7+6$ ) which are often optimal for di-  
349 minishing returns.

350 Fig. 7 show the results for survival landscapes. The main difference in this case is that the uni-  
351 cellular propagule strategy can be the optimal strategy even when group living is characterised by  
352 diminishing returns. In general, fecundity benefits make equal binary fragmentation optimal under  
353 more demographic scenarios, while survival benefits make the unicellular propagule strategy optimal  
354 under more demographic scenarios.

## 355 Discussion

356 Reproduction is such a fundamental feature of living systems that the idea that the mode of reproduc-  
357 tion may be shaped by natural selection is easily overlooked. Here, we analysed a matrix population  
358 model that captures the demographic dynamics of complexes that grow by staying together and re-  
359 produce by fragmentation. The costs and benefits associated with group size ultimately determine  
360 whether or not a single cell fragments into two separate daughter cells upon cell division, or whether  
361 those daughter cells remain in close proximity, with fragmentation occurring only after subsequent

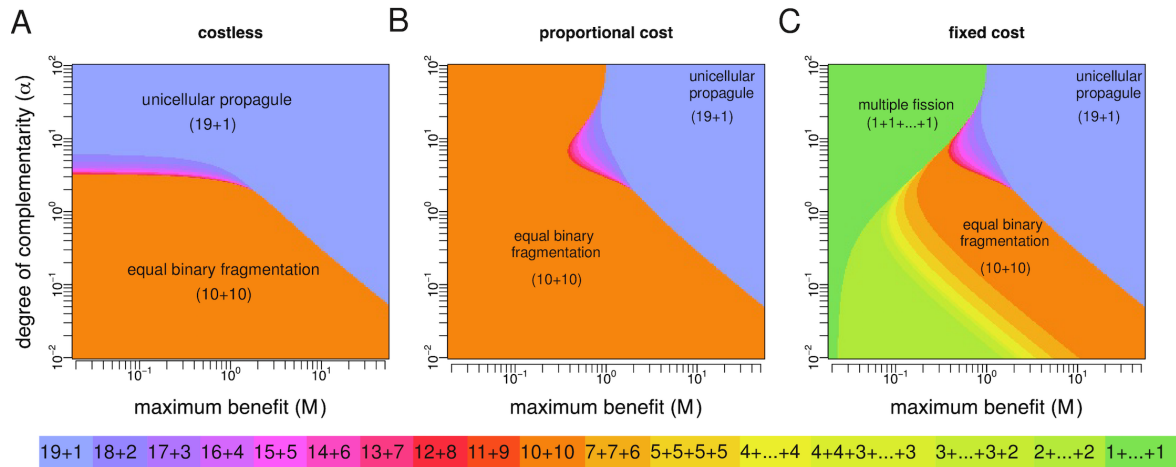

Figure 7: **Optimal life cycles under monotonic survival landscapes.** Death rates are given by  $d_i = M(1 - g_i)$  where  $g_i = [(i - 1)/(n - 2)]^\alpha$ . **A** Costless fragmentation,  $n = 20$ . **B** Fragmentation with proportional costs,  $n = 21$ . **C** Fragmentation with fixed costs,  $n = 21$ . For costless fragmentation and fragmentation with proportional costs, only binary modes 19+1, 18+2,..., 10+10 are optimal. In these cases, diminishing returns to scale ( $\alpha < 1$ ) make equal binary fragmentation (10+10) optimal. Also, optimality of the unicellular propagule strategy (19+1) requires increasing returns to scale ( $\alpha > 1$ ). For fragmentation with fixed costs, nonbinary modes 7+7+6,...,1+...+1 can also be optimal.

362 rounds of division. We allowed for a vast and complete space of fragmentation strategies, including  
 363 pure modes (specifying all possible combinations of size at fragmentation and fragmentation pattern)  
 364 and mixed modes (specifying all probability distributions over the set of pure modes), and identified  
 365 those modes achieving a maximum growth rate for given fecundity and survival size-dependent rates.  
 366 Our research questions and methodology thus resonates with previous studies in life history theory  
 367 [32, 33]. In the language of this field, our fragmentation strategies specify both the size at first repro-  
 368 duction and clutch size, where the latter is subject to a very specific trade-off between the number and  
 369 size of offspring mathematically given by integer partitions.

370 We found that for any fitness landscape, the optimal life cycle is always a deterministic fragmen-  
 371 tation mode involving the regular schedule of group development and fragmentation. This makes  
 372 intuitive sense given our assumption that the environment is constant. However, this result might not  
 373 hold if the environment is variable so that the fitness landscape changes over time. In this case differ-  
 374 ent pure fragmentation modes will be optimal at different times, and natural selection might favour life

375 cycles that randomly express a subset of locally optimal fragmentation patterns. Indeed, the evolution  
376 of variable phenotypes in response to changing environmental conditions (also known as bet hedging  
377 [34, 35]) has been demonstrated in other life history traits, such as germination time in annual plants  
378 [36], and capsulation in bacteria [37]. The extent to which mixed fragmentation modes can evolve  
379 via a similar mechanism is beyond the scope of this paper, but it can be addressed in future work by  
380 applying existing theory on matrix population models in stochastic environments [22].

381 We found that when fragmentation is costless, only strategies involving binary splitting (i.e., frag-  
382 mentation into exactly two parts) are optimal. This result holds for all possible fitness landscapes,  
383 and hence any specification of how fecundity or survival benefits might accrue to group living. In  
384 particular, the optimal fragmentation mode under monotonic fitness landscapes is generally one of  
385 two types: equal binary fragmentation, which involves fission into two equal size groups, and the uni-  
386 cellular propagule strategy, which involves the production of two groups, one comprised of a single  
387 cell. Equal fragmentation is favoured when there is a significant advantage associated with formation  
388 of even the smallest group, whereas production of a unicellular propagule is favoured when the bene-  
389 fits associated with group size are not evident until groups become large. This makes intuitive sense:  
390 when advantages arise when groups are small, it pays for offspring to be in groups (and not single  
391 cells). Conversely, when there is little gain until group size is large, it makes sense to maintain one  
392 group that reaps this advantage. Interestingly, two bacteria that form groups and are well studied from  
393 a clinical perspective, *Neisseria gonorrhoeae* and *Staphylococcus aureus*, both show evidence of the  
394 above binary splitting fragmentation modes: *Neisseria gonorrhoeae* divide into groups of two equal  
395 sizes [6], while *Staphylococcus aureus* divide into one large group plus a unicellular propagule [7].  
396 This leads to questions concerning the nature of the fitness landscape occupied by these bacteria and  
397 the basis of any collective level benefit as assumed by our model.

398 Once cell loss upon fragmentation is incorporated as a factor in collective reproduction, a wider  
399 range of fragmentation patterns becomes optimal. When fragmentation costs are fixed to a given  
400 number of cells, optimal fragmentation modes include those where splitting involves the production  
401 of multiple offspring. Among these, a prominent fragmentation strategy is multiple fission, where a  
402 group breaks into multiple independent cells. Such a fragmentation mode is reminiscent of palintomy  
403 in the volvocine algae[38]. A key difference between our “multiple fission” and palintomy is that  
404 the former involves a group of cells growing up to a threshold size at which point fragmentation

405 happens, while the latter involves a single reproductive cell growing to many times its initial size  
406 and then undergoing several rounds of division. However, reinterpreting birth rates of cells in groups  
407 as growth rates of unicells of different sizes allows us to use our analysis to determine conditions  
408 under which such a mode of fragmentation is more adaptive than, say, the more standard strategy of  
409 growing to twice the initial size and then dividing in two (which for arbitrary sizes of offspring groups  
410 is equivalent to our “equal binary fragmentation” mode). Our results suggest that palintomy is favored  
411 over binary fission (and any other fragmentation mode) under a wide range of demographic scenarios  
412 (Fig. 6C).

413 Many multicellular organisms are characterised by a life cycle whereby adults develop from a sin-  
414 gle cell [39]. Passing through such a unicellular bottleneck is a requirement for sexual reproduction  
415 based on syngamy, but life cycles with unicellular stages are also common in asexual reproduction  
416 modes such as those used by multicellular algae and ciliates [40], and colonial bacteria such as *S.*  
417 *aureus* [7]. If multicellularity evolved because of the benefits associated to group living, why do  
418 so many asexual multicellular organisms begin their life cycles as solitary (and potentially vulnera-  
419 ble) cells? Explanatory hypotheses include the purge of deleterious mutations and the reduction of  
420 within-organism conflict [41, 39]. Our results make the case for an alternative (and perhaps more  
421 parsimonious) explanation: often, a life cycle featuring a unicellular bottleneck is the best way to  
422 guarantee that the “parent” group remains as large as possible to reap maximum fecundity and/or sur-  
423 vival advantages of group living. Indeed, our theoretical results resonate with previous experimental  
424 work demonstrating that single-cell bottlenecks can be adaptive simply because they constitute the life  
425 history strategy that maximises reproductive success [42].

426 Previous theoretical work has explored questions related to the evolution of multicellularity using  
427 matrix population models similar to the one proposed in this paper. In a seminal contribution, Roze and  
428 Michod [43] explored the evolution of propagule size in the face of deleterious and selfish mutations.  
429 In their model, multicellular groups first grow to adult size and then reproduce by splitting into equal  
430 size groups, so that fragmentation mode strategies can be indexed by the size of the propagule. In  
431 our terminology, this refers to either “multiple fission” or “multiple groups”. An important finding  
432 of Roze and Michod [43] is that, even if large groups are advantageous, small propagules can be  
433 selected because they are more efficient at eliminating detrimental mutations. We did not study the  
434 effects of mutations, but allowed for general fitness landscapes and fragmentation modes, including

435 cases of asymmetric binary division (e.g., the unicellular propagule strategy) neglected by Roze and  
436 Michod [43]. Our results indicate that modes of fragmentation involving single cells can lead to  
437 growth rate maximisation even when small propagule sizes divide less efficiently or die at a higher  
438 rate. In particular, we have shown that if fragmentation is costly, a strategy consisting of a multiple  
439 fragmentation mode with a propagule size of one (i.e., the small propagule strategy studied by Roze  
440 and Michod [43]) can be adaptive for reasons other than the elimination of deleterious mutations.

441 Closer to our work, Tarnita et al. [18] investigated the evolution of multicellular life cycles via  
442 two alternative routes: “staying together” (ST, whereby offspring cells remain attached to the parent)  
443 and “coming together” (CT, whereby cells of different origins aggregate in a group). In particular,  
444 they studied the conditions under which a multicellular strategy that produces groups via ST can  
445 outperform a solitary strategy whereby cells always separate after division. The way they modelled  
446 group formation and analyzed the resulting population dynamics (by means of biological reactions and  
447 matrix models) is closely related to our approach. Indeed, their solitary strategy is our binary mode  
448 1+1, while their ST strategy corresponds to a particular kind of binary mixed fragmentation mode.  
449 However, the questions we ask are different. Tarnita et al. [18] were concerned with the conditions  
450 under which (multicellular) strategies that form groups can invade and replace (unicellular) strategies  
451 that remain solitary. Contrastingly, we aimed to understand the optimal fragmentation mode out of the  
452 vast space of fragmentation strategies comprising all possible deterministic and probabilistic pathways  
453 by which complexes can stay together and split apart. A key finding is that, for any fitness landscape  
454 and if the environment is constant, mixed fragmentation modes such as some of the ST strategies  
455 considered by Tarnita et al. [18] will be outperformed by at least one pure fragmentation mode.

456 More recently, Rashidi et al. [20] developed a conceptual framework to study the competition  
457 of life cycles that involved five different life cycles defined by fragmentation patterns of the form  
458 1+1+...+1 and an associated genetic control. Their model, which explicitly considers growing cells  
459 of different size, showed that depending on the fitness landscape, each of their five life cycles could  
460 prevail. By extending the range of life cycles to encompass all possible fragmentation modes (albeit  
461 with less detailed attributes), we have shown that certain life cycles will be suboptimal for any given  
462 fitness landscape.

463 In line with many studies in life history theory [32, 33], we made the simplifying assumption  
464 that the phenotype consists of demographic traits (in our case, probabilities of fragmenting into given



465 fragmentation patterns) linked by trade-offs which interact to determine fitness (growth rate). This al-  
466 lowed us to predict the optimal phenotype at equilibrium at the expense of leaving unspecified whether,  
467 due to genetic constraints, such an equilibrium will be possible in an actual biological system. The  
468 question that inevitably arises is whether, given a presumptive genotype-phenotype mapping, it is pos-  
469 sible for evolution to fine tune life cycles with group-level properties (such as specific fragmentation  
470 patterns) so that optimal fragmentation modes will be obtained as the endpoint of an evolutionary  
471 process. While a complete answer requires a more sophisticated analysis, we see no conceptual ob-  
472 struction preventing seemingly arbitrary fragmentation modes to evolve. Firstly, genotype-phenotype  
473 maps of existing organisms can be complex and offer opportunity for adaptation, involving important  
474 qualitative behavioral changes [44, 45, 46]. Secondly, small genotypic changes can produce major  
475 phenotypic changes. For instance, Hammerschmidt et al. [3] observed the emergence of collective-  
476 level properties in a previously unicellular organism that was caused by a small number of mutations.  
477 Thirdly, even if a current set of genes cannot provide an appropriate template for given phenotypic  
478 traits, new genes can emerge de novo [47, 48, 49, 50, 51]. Finally, theoretical arguments suggest that  
479 genetic constraints can be effectively overcome in phenotypic evolution provided there is a rich variety  
480 of new mutant alleles [52]. We thus think that, both in the field and in the laboratory, multicellular  
481 organisms will be able to evolve a phenotype close to the optimal fragmentation mode in the (very)  
482 long run.

## 483 **Acknowledgements**

484 We would like to thank two anonymous reviewers for their helpful comments.



## 485 Appendix

### 486 A Mixed fragmentation modes

487 A mixed fragmentation mode assigns a probability  $q_\kappa$  to each possible fragmentation pattern (or par-  
 488 tition)  $\kappa \vdash 2, \dots, \kappa \vdash n$ , where  $n$  is the maximum group size. Such probabilities satisfy  $\sum_{\kappa \vdash j} q_\kappa = 1$   
 489 for  $j = 2, \dots, n$ , i.e., when growing from size  $j - 1$  to  $j$  one of the partitions  $\kappa \vdash j$  (including staying  
 490 together without splitting,  $\kappa = j$ ) will certainly occur. Additionally, we impose  $q_n = 0$  so that, when  
 491 growing from size  $n - 1$  to size  $n$ , a group can no longer stay together and will necessarily fragment.  
 492 It follows that a given life cycle or fragmentation mode can be represented by a set of vectors of the  
 493 form

$$\mathbf{q} = \left\{ \underbrace{(q_2, q_{1+1})}_{\kappa \vdash 2}, \underbrace{(q_3, q_{2+1}, q_{1+1+1})}_{\kappa \vdash 3}, \dots, \underbrace{(q_n, q_{n-1+1}, q_{n-2+2}, \dots, q_{1+1+\dots+1})}_{\kappa \vdash n} \right\}. \quad (6)$$

494 Pure life cycles are a particular case where splitting probabilities  $q_\kappa$  are either zero or one, so that only  
 495 one fragmentation pattern with more than one offspring group occurs.

496 A mixed life cycle can be understood as a set of reactions. A number  $n - 1$  of reactions, of the  
 497 type

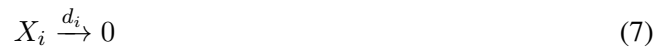

498 model the death of groups; these are independent of the fragmentation mode. An additional number  
 499 of reactions, one per each non-zero element of the vector  $\mathbf{q}$ , models the birth of units and the growth  
 500 or fragmentation of groups. These reactions are of the type

$$X_i \xrightarrow{ib_i q_\kappa} \sum_{j=1}^{i+1} \pi_j(\kappa) X_j, \quad (8)$$

501 whereby a group of size  $i$  turns into a group of size  $i + 1$  at rate  $ib_j$ , and then instantly divides with  
 502 probability  $q_\kappa$  into offspring groups in a way described by fragmentation pattern  $\kappa \vdash i + 1$ , where parts  
 503 equal to  $\ell$  appear a number  $\pi_\ell(\kappa)$  of times. These reactions depend on the life cycle, which specifies  
 504 the probabilities of fragmentation patterns. For instance, the reaction

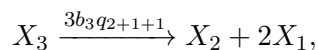

505 stipulates that groups of size 3, which grow to size 4 at rate  $3b_3$ , will split with probability  $q_{2+1+1}$  into  
 506 one group of size 2 and two groups of size 1. The growth of a group without fragmentation is also

507 incorporated in the set of reactions given by (8). For instance, the reaction

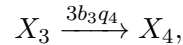

508 stipulates that groups of size 3, which grow to size 4 at rate  $3b_3$ , will not split with probability  $q_4$ .

509 The sets of reactions (7) and (8) give rise to the system of differential equations

$$\dot{x}_i = \sum_{j=1}^{n-1} \sum_{\kappa \vdash j+1} q_\kappa \pi_i(\kappa) j b_j x_j - i b_i x_i - d_i x_i, \quad i = 1, 2, \dots, n-1, \quad (9)$$

510 where  $x_i$  denotes the abundance of groups of size  $i$ . This linear system can be represented in matrix  
511 form as

$$\dot{\mathbf{x}} = \mathbf{A} \mathbf{x}, \quad (10)$$

512 where  $\mathbf{x} = (x_1, x_2, \dots, x_{n-1})$  is the vector of abundances of the groups of different size and  $\mathbf{A}$  is a  
513  $(n-1) \times (n-1)$  matrix with elements given by

$$a_{i,j} = j b_j \sum_{\kappa \vdash j+1} q_\kappa \pi_i(\kappa) - \delta_{i,j} (i b_i + d_i), \quad (11)$$

514 where  $\delta_{i,j}$  is the Kronecker delta. Since  $\pi_i(\kappa) = 0$  for  $\kappa \vdash j+1$  and  $i > j+1$  (a partition of a number  
515 has no parts larger than the number), the entries of  $\mathbf{A}$  below the subdiagonal are zero. As an example,  
516 consider  $n = 4$ . The projection matrix for this case is given by

$$\mathbf{A} = \begin{pmatrix} b_1 \sum_{\kappa \vdash 2} q_\kappa \pi_1(\kappa) - b_1 - d_1 & 2b_2 \sum_{\kappa \vdash 3} q_\kappa \pi_1(\kappa) & 3b_3 \sum_{\kappa \vdash 4} q_\kappa \pi_1(\kappa) \\ b_1 \sum_{\kappa \vdash 2} q_\kappa \pi_2(\kappa) & 2b_2 \sum_{\kappa \vdash 3} q_\kappa \pi_2(\kappa) - 2b_2 - d_2 & 3b_3 \sum_{\kappa \vdash 4} q_\kappa \pi_2(\kappa) \\ 0 & 2b_2 \sum_{\kappa \vdash 3} q_\kappa \pi_3(\kappa) & 3b_3 \sum_{\kappa \vdash 4} q_\kappa \pi_3(\kappa) - 3b_3 - d_3 \end{pmatrix}. \quad (12)$$

## 517 **B Mixed fragmentation modes are dominated**

518 For any fitness landscapes, mixed fragmentation modes are dominated by at least one pure life cycle.  
519 In other words, the optimal life cycle is pure.

520 To prove this result, consider the set of partitions  $\kappa \vdash j$  for a given  $j$ , fix the probabilities of  
521 fragmentation patterns  $\nu \vdash i \neq j$  to arbitrary values, and focus attention on the function

$$\lambda_1^j : S_j \rightarrow \mathbb{R},$$

522 mapping probability distributions in the  $\zeta_j$ -simplex  $S_j \subset \mathbb{R}^{\zeta_j}$  (specifying the probabilities of all  
523 partitions  $\kappa \vdash j$ ) to the dominant eigenvalue  $\lambda_1^j$  of the associated projection matrix  $\mathbf{A}$ . Our goal is to

524 show that, for any  $j$ ,  $\lambda_1^j$  is a quasiconvex function, i.e., that

$$\lambda_1^j(\eta \mathbf{x}_1 + (1 - \eta) \mathbf{x}_2) \leq \max \left\{ \lambda_1^j(\mathbf{x}_1), \lambda_1^j(\mathbf{x}_2) \right\}$$

525 holds for all  $\mathbf{x}_1, \mathbf{x}_2 \in S_j$  and  $\eta \in [0, 1]$ . Quasiconvexity of  $\lambda_1^j$  implies that  $\lambda_1^j$  achieves its maximum  
 526 at an extreme point of  $S_j$ , i.e., at a probability distribution that puts all of its mass in a single frag-  
 527 mentation pattern. Quasiconvexity of  $\lambda_1^j$  for all  $j$  then implies that the maximum growth rate  $\lambda_1$  is  
 528 achieved by a pure fragmentation mode, and that mixed fragmentation modes are dominated.

529 To show that  $\lambda_1^j$  is quasiconvex, we restrict the function to an arbitrary line and check quasicon-  
 530 vexity of the resulting scalar function [53, p. 99]. More precisely, we aim to show that the function

$$f(t) = \lambda_1^j(\mathbf{u} + t\mathbf{v}),$$

531 is quasiconvex in  $t$  for any  $\mathbf{u} \in S_j$  and  $\mathbf{v} \in \mathbb{R}^{\zeta_j}$  such that  $\mathbf{u} + t\mathbf{v} \in S_j$ . We hence need to verify that

$$f(\tau t_1 + (1 - \tau)t_2) \leq \max \{f(t_1), f(t_2)\} \quad (13)$$

532 holds for  $\tau \in [0, 1]$ .

533 To show this, note that the function  $f(t) = \lambda_1^j(\mathbf{u} + t\mathbf{v})$  is given implicitly by the largest root of  
 534 the characteristic polynomial

$$p(\lambda) = \det(\mathbf{A} - \lambda \mathbf{I}), \quad (14)$$

535 where the probabilities of fragmentation specified by  $\mathbf{u} + t\mathbf{v}$  appear in the  $(j - 1)$ -th column of the  
 536 projection matrix  $\mathbf{A}$  (see Eqs. (11) and (12)).

537 The right hand side of Eq. (14) can be written using a Laplace expansion along the  $(j - 1)$ -th  
 538 column of  $\mathbf{A} - \lambda \mathbf{I}$ :

$$\det(\mathbf{A} - \lambda \mathbf{I}) = \sum_{i=0}^{n-1} (-1)^{i+j-1} (a_{i,j-1} - \delta_{i,j-1} \lambda) M_{i,j-1}, \quad (15)$$

539 where  $\delta_{i,j-1}$  is the Kronecker delta and  $M_{i,j-1}$  is the  $(i, j - 1)$  minor of  $\mathbf{A}$ , i.e., the determinant of  
 540 the submatrix obtained from  $\mathbf{A}$  by deleting the  $i$ -th row and  $(j - 1)$ -th column. Each minor  $M_{i,j-1}$   
 541 is independent of  $t$  because the only entries of  $\mathbf{A}$  that depend on  $t$  appear in the  $(j - 1)$ -th column.  
 542 Moreover, each entry  $a_{i,j-1}$  is either zero or a linear function of  $t$ . Hence,  $p(\lambda)$  is a polynomial on  $\lambda$   
 543 with coefficients that are linear in  $t$ , i.e., of the form

$$p(\lambda) = \sum_{k=0}^{n-1} (\alpha_k + \beta_k t) \lambda^k, \quad (16)$$

544 for some  $\alpha_k, \beta_k$ . Moreover, since the leading coefficient must be  $(-1)^{n-1}$  (the matrix  $\mathbf{A}$  is  $(n-1) \times$   
 545  $(n-1)$ ), it follows that  $\alpha_{n-1} = (-1)^{n-1}$  and  $\beta_{n-1} = 0$ .

546 Denote by  $p_\tau(\lambda)$ ,  $p_1(\lambda)$ , and  $p_2(\lambda)$  the characteristic polynomials corresponding to, respectively,  
 547 the probability distributions given by  $\mathbf{u} + [\tau t_1 + (1-\tau)t_2]\mathbf{v}$ ,  $\mathbf{u} + t_1\mathbf{v}$ , and  $\mathbf{u} + t_2\mathbf{v}$ . From Eq. (16),  
 548 these are given by

$$p_\tau(\lambda) = \sum_{k=0}^{n-1} (\alpha_k + \beta_k [\tau t_1 + (1-\tau)t_2]) \lambda^k = \sum_{k=0}^{n-1} \alpha_k \lambda^k + [\tau t_1 + (1-\tau)t_2] \sum_{k=0}^{n-1} \beta_k \lambda^k, \quad (17a)$$

$$p_1(\lambda) = \sum_{k=0}^{n-1} (\alpha_k + \beta_k t_1) \lambda^k = \sum_{k=0}^{n-1} \alpha_k \lambda^k + t_1 \sum_{k=0}^{n-1} \beta_k \lambda^k, \quad (17b)$$

$$p_2(\lambda) = \sum_{k=0}^{n-1} (\alpha_k + \beta_k t_2) \lambda^k = \sum_{k=0}^{n-1} \alpha_k \lambda^k + t_2 \sum_{k=0}^{n-1} \beta_k \lambda^k. \quad (17c)$$

549 Subtracting Eq. (17b) from Eq. (17a), and Eq. (17c) from Eq. (17a), we can write

$$p_\tau(\lambda) - p_1(\lambda) = (t_2 - t_1)(1-\tau) \sum_{k=0}^{n-1} \beta_k \lambda^k,$$

$$p_\tau(\lambda) - p_2(\lambda) = (t_1 - t_2)\tau \sum_{k=0}^{n-1} \beta_k \lambda^k.$$

550 Note that the signs of these differences are always different, i.e., either (i)  $p_\tau(\lambda) - p_1(\lambda) \geq 0$  and  
 551  $p_\tau(\lambda) - p_2(\lambda) \leq 0$ , or (ii)  $p_\tau(\lambda) - p_1(\lambda) \leq 0$  and  $p_\tau(\lambda) - p_2(\lambda) \geq 0$ . In the first case, we have  
 552  $p_1(\lambda) \leq p_\tau(\lambda) \leq p_2(\lambda)$  and in the second we have  $p_2(\lambda) \leq p_\tau(\lambda) \leq p_1(\lambda)$ , i.e., for each  $\lambda$ ,  $p_\tau(\lambda)$   
 553 lies between  $p_1(\lambda)$  and  $p_2(\lambda)$ , or, equivalently

$$p_\tau(\lambda) \leq \max \{p_1(\lambda), p_2(\lambda)\}, \quad (18)$$

554 for all  $\lambda$ . Since  $\lambda_1^j$  is the largest root of  $p(\lambda)$ , and since  $p_\tau(\lambda)$ ,  $p_1(\lambda)$ , and  $p_2(\lambda)$  all have the same  
 555 sign in the limit when  $\lambda$  tends to infinity (their leading coefficients are all equal to  $\alpha_{n-1} = (-1)^{n-1}$ ),  
 556 condition (18) implies condition (13), thus proving our claim. See Fig. 8 for an illustration.

## 557 C Mixing between 1+1 and 2+1 is dominated

558 To show that the life cycle mixing between fragmentation modes 1+1 and 2+1 with probability  $q$   
 559 represented in vector form as

$$\mathbf{q} = \{(q_2, q_{1+1}), (q_3, q_{2+1}, q_{1+1+1})\} = \{(q, 1-q), (0, 1, 0)\} \quad (19)$$

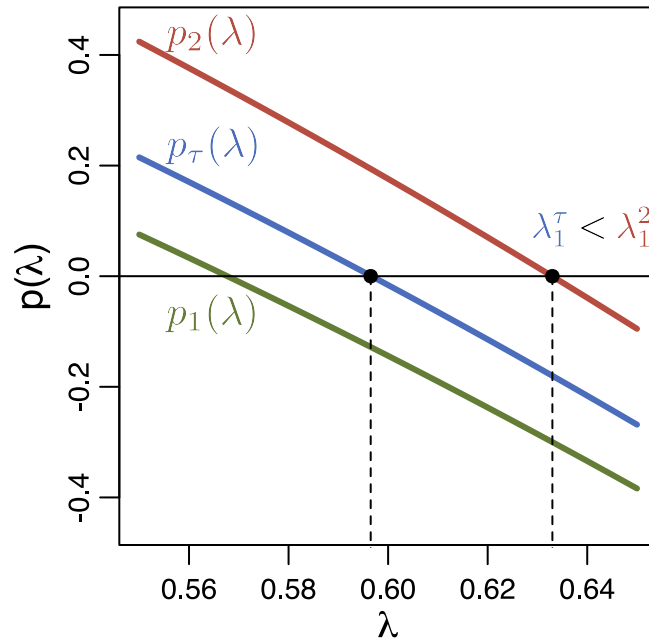

Figure 8: **Population growth rate  $\lambda_1$  is quasiconvex.** Consider two fragmentation modes  $\mathbf{q}_1$  and  $\mathbf{q}_2$  which differ only in the probabilities of fragmentation patterns at a single size  $j$ . Then, for any  $0 \leq \tau \leq 1$  and corresponding fragmentation mode  $\mathbf{q}_\tau = \tau\mathbf{q}_1 + (1 - \tau)\mathbf{q}_2$ , the polynomials  $p(\lambda)$  given by Eq. (14) satisfy either  $p_1(\lambda) \leq p_\tau(\lambda) \leq p_2(\lambda)$  or  $p_2(\lambda) \leq p_\tau(\lambda) \leq p_1(\lambda)$ . Thus,  $\mathbf{q}_\tau$  leads to a lower growth rate than either  $\mathbf{q}_1$  or  $\mathbf{q}_2$ , i.e., either  $\lambda_1^\tau \leq \lambda_1^1$ , or  $\lambda_1^\tau \leq \lambda_1^2$  holds. Here,  $j = 3$ ,  $\mathbf{q}_1 = \{(0.9, 0.1), (0.5, 0.5, 0), (0, 0, 0, 1, 0)\}$ ,  $\mathbf{q}_2 = \{(0.9, 0.1), (0.5, 0, 0.5), (0, 0, 0, 1, 0)\}$ , and  $\tau = 0.6$ . The fitness landscape is given by  $b_i = 1/i$ ,  $d_i = 0$  for all  $i$ .

560 is dominated, consider its growth rate  $\lambda_1^q$  as a function of  $q$ , as given by the solution of characteristic  
561 equation

$$\lambda_1^q = \frac{b_1(1-2q) - (d_1 + d_2) + \sqrt{(d_1 + d_2 - (1-2q)b_1)^2 + 4b_1(2qb_2 + (1-2q)d_2)}}{2}.$$

562 We have  $\lambda_1^q(0) = \lambda_1^{1+1}$  and  $\lambda_1^q(1) = \lambda_1^{2+1}$ . A sufficient condition for  $q$  to be dominated by either 1+1  
563 or 2+1 is then that  $\lambda_1^q(q)$  is monotonic in  $q$ . To show that this is the case, note that the derivative of  $\lambda_1^q$   
564 with respect to  $q$  is given by

$$\frac{d\lambda_1^q}{dq} = b_1 \left( -1 + \frac{(2q-1)b_1 + 2b_2 + d_1 - d_2}{\sqrt{((2q-1)b_1 + d_1 + d_2)^2 + 4b_1(2qb_2 - (2q-1)d_2) - 4d_1d_2}} \right),$$

565 and that such expression is equal to zero if and only if

$$b_1 - b_2 = d_1 - d_2 \quad (20)$$

566 which is independent of  $q$ . It follows that  $\lambda_1^q$  is either nonincreasing or nondecreasing in  $q$ , and hence  
567 that it attains its maximum at either  $q = 0$ ,  $q = 1$ , or (when (20) is satisfied) at any  $q \in [0, 1]$ . Hence,  
568  $q$  is dominated by either 1+1 or 2+1.

## 569 **D Characteristic equation of a pure fragmentation mode**

570 Consider the pure fragmentation mode  $\kappa \vdash \ell$ , whereby groups grow up to size  $\ell$  and then fragment  
571 according to fragmentation pattern  $\kappa$ . The projection matrix is a  $(\ell - 1) \times (\ell - 1)$  matrix of the form

$$\mathbf{A} = \begin{pmatrix} -b_1 - d_1 & 0 & \cdots & 0 & (\ell - 1)b_{\ell-1}\pi_1(\kappa) \\ b_1 & -2b_2 - d_2 & 0 & \vdots & (\ell - 1)b_{\ell-1}\pi_2(\kappa) \\ 0 & 2b_2 & -3b_3 - d_3 & 0 & (\ell - 1)b_{\ell-1}\pi_3(\kappa) \\ 0 & 0 & \ddots & \ddots & \vdots \\ 0 & 0 & \cdots & (\ell - 2)b_{\ell-2} & (\ell - 1)b_{\ell-1}(\pi_{\ell-1}(\kappa) - 1) - d_{\ell-1} \end{pmatrix}.$$

572 The population growth rate is given by the leading eigenvalue  $\lambda_1$  of  $\mathbf{A}$ , i.e., the largest solution of  
573 the characteristic equation

$$\det(\mathbf{A} - \lambda\mathbf{I}) = 0. \quad (21)$$

574 By using a Laplace expansion along the last column of  $\mathbf{A} - \lambda\mathbf{I}$ , we can rewrite the left hand side of

575 the above expression (i.e., the characteristic polynomial of  $\mathbf{A}$ ) as

$$\det(\mathbf{A} - \lambda\mathbf{I}) = \sum_{i=1}^{\ell-2} (-1)^{i+\ell-1} (\ell-1) b_{\ell-1} \pi_i(\kappa) M_{i,\ell-1} \quad (22)$$

$$+ (-1)^{2(\ell-1)} [(\ell-1) b_{\ell-1} \pi_{\ell-1}(\kappa) - (\ell-1) b_{\ell-1} - d_{\ell-1} - \lambda] M_{\ell-1,\ell-1}$$

$$= \sum_{i=1}^{\ell-1} (-1)^{i+\ell-1} (\ell-1) b_{\ell-1} \pi_i(\kappa) M_{i,\ell-1} - [(\ell-1) b_{\ell-1} + d_{\ell-1} + \lambda] M_{\ell-1,\ell-1} \quad (23)$$

576 where  $M_{i,\ell-1}$  is the  $(i, \ell-1)$ -th minor of  $\mathbf{A} - \lambda\mathbf{I}$ . For all  $i = 1, \dots, \ell-1$ , the minor  $M_{i,\ell-1}$  is  
 577 the determinant of a block diagonal matrix, and hence equal to the product of the determinants of the  
 578 diagonal blocks. Moreover, each diagonal block is either a lower triangular or an upper triangular  
 579 matrix, whose determinant is given by the product of the elements in their main diagonals. We can  
 580 then write

$$M_{i,\ell-1} = \prod_{j=1}^{i-1} (-j b_j - d_j - \lambda) \prod_{j=i}^{\ell-2} j b_j. \quad (24)$$

581 Substituting Eq. (24) into Eq. (23) and simplifying, we obtain

$$\det(\mathbf{A} - \lambda\mathbf{I}) = (-1)^{\ell-2} \sum_{i=1}^{\ell-1} (\ell-1) b_{\ell-1} \pi_i(\kappa) \prod_{j=1}^{i-1} (j b_j + d_j + \lambda) \prod_{j=i}^{\ell-2} j b_j$$

$$- (-1)^{\ell-2} ((\ell-1) b_{\ell-1} + d_{\ell-1} + \lambda) \prod_{j=1}^{\ell-2} (j b_j + d_j + \lambda)$$

$$= (-1)^{\ell-2} \left[ \prod_{j=1}^{\ell-1} j b_j \right] \left( \left[ \sum_{i=1}^{\ell-1} \pi_i(\kappa) \prod_{j=1}^{i-1} \left( 1 + \frac{d_j + \lambda}{j b_j} \right) \right] - \prod_{j=1}^{\ell-1} \left( 1 + \frac{d_j + \lambda}{j b_j} \right) \right).$$

582 Replacing this expression into the characteristic equation (21), dividing both sides by  $(-1)^{\ell-1} \prod_{j=1}^{\ell-1} j b_j$ ,  
 583 and simplifying, we finally obtain that the characteristic equation (21) can be written as

$$F_\ell(\lambda) - \sum_{i=1}^{\ell-1} \pi_i(\kappa) F_i(\lambda) = 0, \quad (25)$$

584 where

$$F_i(\lambda) = \prod_{j=1}^{i-1} \left( 1 + \frac{d_j + \lambda}{j b_j} \right). \quad (26)$$

585 Note that the following two transformations:

$$\mathbf{d} \rightarrow \mathbf{d} - r, \quad \lambda \rightarrow \lambda + r, \quad r \leq \min(\mathbf{d}),$$

586 and

$$\mathbf{d} \rightarrow s\mathbf{d}, \quad \mathbf{b} \rightarrow s\mathbf{b}, \quad \lambda \rightarrow s\lambda, \quad s > 0.$$

587 preserve the solution of Eq. (25) This allows us to set  $b_1 = 1$  and  $\min(\mathbf{d}) = 0$  without loss of  
 588 generality.

## 589 **E Fragmentation modes are dominated by binary splitting**

590 We can show that, for any fitness landscape, binary fragmentation achieves a larger growth rate than  
 591 splitting into more than two offspring groups. To prove this, consider (i) positive integers  $m$ ,  $j$ , and  $k$   
 592 such that  $m > j+k$ , (ii) an arbitrary partition  $\tau \vdash m-j-k$ , and (iii) the following three fragmentation  
 593 modes:

- 594 1.  $\kappa_1 = j + k + \tau \vdash m$ , whereby a complex of size  $m$  fragments into one complex of size  $j$ , one  
 595 complex of size  $k$ , and a number of offspring complexes given by partition  $\tau$ .
- 596 2.  $\kappa_2 = (j + k) + \tau \vdash m$ , whereby a complex of size  $m$  fragments into one complex of size  $j + k$ ,  
 597 and a number of offspring complexes given by partition  $\tau$ .
- 598 3.  $\kappa_3 = j + k \vdash (j + k)$ , a binary splitting fragmentation mode whereby a complex of size  $j + k$   
 599 fragments into two offspring complexes: one of size  $j$ , and one of size  $k$ .

600 Fragmentation mode  $\kappa_1$  leads to a number of offspring groups equal to

$$n_1 = 2 + \sum_{\ell=1}^{m-j-k} \pi_{\ell}(\tau),$$

601 fragmentation mode  $\kappa_2$  to a number of offspring groups equal to

$$n_2 = 1 + \sum_{\ell=1}^{m-j-k} \pi_{\ell}(\tau) = n_1 - 1,$$

602 and fragmentation mode  $\kappa_3$  to a number of offspring groups equal to two. Denoting by  $\lambda_1^i$  the growth  
 603 rate of fragmentation mode  $\kappa_i$ , we can show that, for any fitness landscape, either  $\lambda_1^1 \leq \lambda_1^2$  or  $\lambda_1^1 \leq \lambda_1^3$   
 604 holds, i.e., a fragmentation mode with more than two parts is dominated by either a fragmentation  
 605 mode with one part less or by a fragmentation mode with exactly two parts. By induction, this implies  
 606 that the optimal life cycle is always one within the class of binary fragmentation modes.

607 To prove that either  $\lambda_1^1 \leq \lambda_1^2$  or  $\lambda_1^1 \leq \lambda_1^3$  holds, let us denote by  $p_i(\lambda)$  the characteristic polynomial  
 608 associated to mode  $\kappa_i$ , as given by the left hand side of Eq. (25) after the replacement  $\kappa = \kappa_i$ . The



609 growth rate  $\lambda_1^i$  of mode  $\kappa_i$  is hence the largest root of  $p_i(\lambda)$ . The polynomials  $p_1(\lambda)$ ,  $p_2(\lambda)$ , and  $p_3(\lambda)$   
 610 are then given by

$$p_1(\lambda) = F_m(\lambda) - \sum_{\ell=1}^{m-j-k} \pi_\ell(\tau) F_\ell(\lambda) - F_j(\lambda) - F_k(\lambda), \quad (27a)$$

$$p_2(\lambda) = F_m(\lambda) - \sum_{\ell=1}^{m-j-k} \pi_\ell(\tau) F_\ell(\lambda) - F_{j+k}(\lambda), \quad (27b)$$

$$p_3(\lambda) = F_{j+k}(\lambda) - F_j(\lambda) - F_k(\lambda). \quad (27c)$$

611 These polynomials satisfy the following two properties. First,

$$\lim_{\lambda \rightarrow \infty} p_i(\lambda) = \infty, \quad (28)$$

612 as the leading coefficient of the left hand side of Eq. (25) is always positive. Second, we can write

$$p_1(\lambda) = p_2(\lambda) + p_3(\lambda). \quad (29)$$

613 Now, evaluating Eq. (29) at  $\lambda_1^1$ , and since  $p_1(\lambda_1^1) = 0$ , it follows that  $p_2(\lambda_1^1) = -p_3(\lambda_1^1)$ . Hence, only  
 614 one of the following three scenarios is satisfied: (i)  $p_2(\lambda_1^1) < 0 < p_3(\lambda_1^1)$ , (ii)  $p_2(\lambda_1^1) = p_3(\lambda_1^1) = 0$ , or  
 615 (iii)  $p_2(\lambda_1^1) > 0 > p_3(\lambda_1^1)$ . If  $p_2(\lambda_1^1) < 0 < p_3(\lambda_1^1)$ , and by Eq. (28) and Bolzano's theorem,  $\lambda_1^1 \leq \lambda_1^2$   
 616 holds. Likewise, if  $p_2(\lambda_1^1) > 0 > p_3(\lambda_1^1)$ , then  $\lambda_1^1 \leq \lambda_1^3$  holds. Finally, if  $p_2(\lambda_1^1) = p_3(\lambda_1^1) = 0$ ,  
 617 then both  $\lambda_1^1 \leq \lambda_1^2$  and  $\lambda_1^1 \leq \lambda_1^3$  hold. See Fig. 9 for a graphical illustration of these arguments. We  
 618 conclude that either  $\lambda_1^1 \leq \lambda_1^2$  or  $\lambda_1^1 \leq \lambda_1^3$  must hold, which proves our result.

## 619 **F Optimality maps for $n = 4$**

620 For  $n = 4$  there are four pure fragmentation modes: 1+1, 2+1, 2+2, and 3+1. From Eq. (25), their  
 621 characteristic polynomials are respectively given by

$$p_{1+1}(\lambda) = F_2(\lambda) - 2F_1(\lambda), \quad (30a)$$

$$p_{2+1}(\lambda) = F_3(\lambda) - F_2(\lambda) - F_1(\lambda), \quad (30b)$$

$$p_{2+2}(\lambda) = F_4(\lambda) - 2F_2(\lambda), \quad (30c)$$

$$p_{3+1}(\lambda) = F_4(\lambda) - F_3(\lambda) - F_1(\lambda). \quad (30d)$$

622 The optimality maps shown in Fig. 3 of the main text were obtained by comparing the largest  
 623 root of these characteristic polynomials, which we computed numerically. For fecundity landscapes,

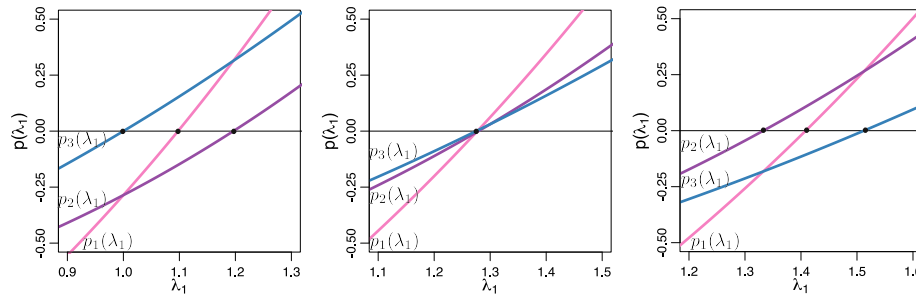

**Figure 9: The population growth rate induced by a fragmentation mode with more than two offspring groups is dominated.** Consider the characteristic polynomials  $p_i(\lambda_1)$  for partitions  $\kappa_1 = 2 + 1 + 1$ ,  $\kappa_2 = 3 + 1$  and  $\kappa_3 = 2 + 1$ . *Left:* Fitness landscape  $\mathbf{b} = (1, 1, 1.4)$ ,  $\mathbf{d} = (0, 0, 0)$ . Since  $p_2(\lambda_1^1) < 0$ ,  $\kappa_1$  is dominated by  $\kappa_2$  ( $\lambda_1^1 < \lambda_1^2$  holds). *Center:* Fitness landscape  $\mathbf{b} = (1, 2.6 - \sqrt{1.3}, 1.4)$ ,  $\mathbf{d} = (0, 0, 0)$ . Since  $p_1(\lambda_1^1) = p_1(\lambda_1^2) = p_1(\lambda_1^3)$ ,  $\kappa_1$  is weakly dominated by  $\kappa_2$  ( $\lambda_1^1 \leq \lambda_1^2$  holds). *Right:* Fitness landscape  $\mathbf{b} = (1, 1.9, 1.4)$ ,  $\mathbf{d} = (0, 0, 0)$ . Since  $p_3(\lambda_1^1) < 0$ ,  $\kappa_1$  is dominated by  $\kappa_3$  ( $\lambda_1^1 < \lambda_1^3$  holds).

624 we tested fitness landscapes of the form  $\{\mathbf{b}, \mathbf{d}\} = \{(1, b_2, b_3), (0, 0, 0)\}$  with  $b_2$  and  $b_3$  taken from a  
 625 rectangular grid of size 300 by 300 with  $b_2 \in [0, 5]$  and  $b_3 \in [0, 5]$ . For viability landscapes, we tested  
 626 fitness landscapes of the form  $\{\mathbf{b}, \mathbf{d}\} = \{(1, 1, 1), (5, d_2, d_3)\}$  with  $d_2$  and  $d_3$  taken from a rectangular  
 627 grid of size 300 by 300 with  $d_2 \in [0, 10]$  and  $d_3 \in [0, 10]$ .

628 The boundaries between areas of optimality can still be computed analytically. They are given by  
 629 the fitness landscapes at which two fragmentation modes have the same population growth rate.

630 The following are the boundaries between areas of optimality under fecundity fitness landscape  
 631 (assuming  $b_1 = 1$  for simplicity):

- 632 • Between fragmentation modes 1+1 and 2+1:  $b_2 = 1, b_3 < 1$ .
- 633 • Between fragmentation modes 1+1 and 3+1:  $b_3 = \frac{2}{3} \left(1 + \frac{1}{2b_2}\right), b_2 < 1$ .
- 634 • Between fragmentation modes 2+1 and 2+2:  $b_3 = \frac{\zeta(2b_2 + \zeta)}{3(2b_2 - \zeta)}$ , where  $\zeta = \frac{\sqrt{1+8b_2}-1}{2}$ , and  $b_2 > 1$ .
- 635 • Between fragmentation modes 3+1 and 2+2:  $b_3 = \frac{2}{3}b_2(2b_2 - 1) \left(2 - \frac{1}{2b_2}\right)$  and  $b_2 > 1$

636 The following are the boundaries between areas of optimality under viability fitness landscape  
 637 (assuming  $d_1 = 0$  for simplicity):

- 638 • Between fragmentation modes 1+1 and 2+1:  $d_2 = 0, d_3 > 0$ .

- 639 • Between fragmentation modes 1+1 and 3+1:  $d_3 = \frac{3}{d_2+3} - 1$ ,  $d_2 > 0$ .
- 640 • Between fragmentation modes 2+1 and 2+2:  $d_3 = 3\frac{2-d_2-\zeta}{2+d_2+\zeta} - \zeta$ , where  $\zeta = \frac{\sqrt{d_2^2-2d_2+9}-1-d_2}{2}$ ,
- 641 and  $d_2 < 0$ .
- 642 • Between fragmentation modes 3+1 and 2+2:  $d_3 = 3\frac{2-d_2-\zeta}{2+d_2+\zeta} - \zeta$ , where  $\zeta = \frac{\sqrt{d_2^2-6d_2+1+1-d_2}}{2}$
- 643 and  $d_2 < 0$

## 644 G Costly fragmentation

645 For costly fragmentation, some cells are lost upon the fragmentation event. In this case the biological  
 646 reactions are still given by Eqs. (7) and (8). However, under costly fragmentation the sum of sizes of  
 647 offspring groups is smaller than the size of the parent group. Therefore, in Eq. (8),  $\kappa$  is a partition  
 648 of  $i' \leq i + 1$  (and not strictly of  $i + 1$  as it was under costless fragmentation). Indeed,  $i' = i + 1$   
 649 in the case of trivial partitions with one part (when a group grows without splitting), but  $i' < i + 1$   
 650 for nontrivial partitions with two or more parts (where the group grows in size by one cell and then  
 651 splits). In this latter case,  $i' = i - \pi + 2$  (where  $\pi$  is the number of offspring groups) for the case of  
 652 proportional costs, and  $i' = i$  for the case of fixed costs.

653 To illustrate the difference in the available sets of partitions for each of the three scenarios we  
 654 investigate (costless fragmentation, fragmentation with proportional cost, fragmentation with fixed  
 655 cost), consider the following possible reactions for a 4-cell group growing into a 5-cell group. For  
 656 costless fragmentation, we have

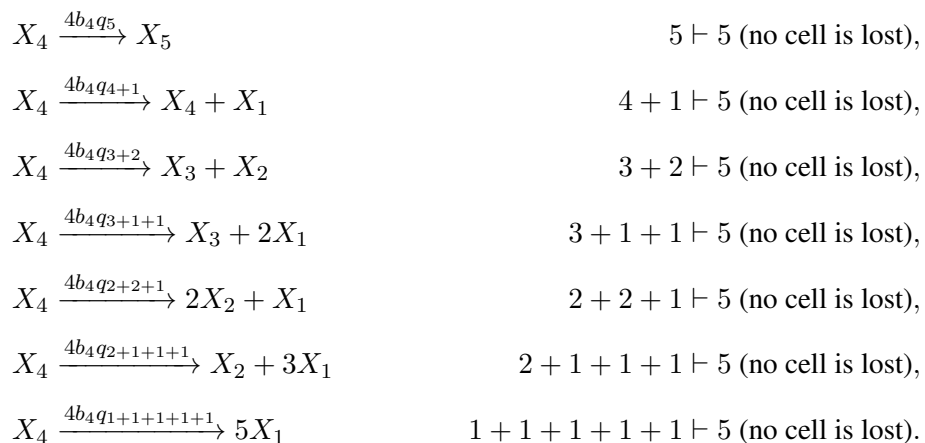

657 For fragmentation with fixed cost, we have

$$\begin{aligned}
 X_4 &\xrightarrow{4b_4q_5} X_5 && 5 \vdash 5 \text{ (no cell is lost),} \\
 X_4 &\xrightarrow{4b_4q_{3+1}} X_3 + X_1 && 3 + 1 \vdash 4 \text{ (1 cell is lost),} \\
 X_4 &\xrightarrow{4b_4q_{2+2}} 2X_2 && 2 + 2 \vdash 4 \text{ (1 cell is lost),} \\
 X_4 &\xrightarrow{4b_4q_{2+1+1}} X_2 + 2X_1 && 2 + 1 + 1 \vdash 4 \text{ (1 cell is lost),} \\
 X_4 &\xrightarrow{4b_4q_{1+1+1+1}} 4X_1 && 1 + 1 + 1 + 1 \vdash 4 \text{ (1 cell is lost).}
 \end{aligned}$$

658 Finally, for fragmentation with proportional cost, we have

$$\begin{aligned}
 X_4 &\xrightarrow{4b_4q_5} X_5 && 5 \vdash 5 \text{ (no cell is lost),} \\
 X_4 &\xrightarrow{4b_4q_{3+1}} X_3 + X_1 && 3 + 1 \vdash 4 \text{ (1 cell is lost),} \\
 X_4 &\xrightarrow{4b_4q_{2+2}} 2X_2 && 2 + 2 \vdash 4 \text{ (1 cell is lost),} \\
 X_4 &\xrightarrow{4b_4q_{1+1+1}} 3X_1 && 1 + 1 + 1 \vdash 3 \text{ (2 cells are lost).}
 \end{aligned}$$

659 The combined probability of all outcomes of aggregate growth must be equal to one. In the case  
 660 of costless fragmentation, this condition has been given by  $\sum_{\kappa \vdash i+1} q_\kappa = 1$  for  $i = 1, \dots, n - 1$ . For  
 661 costly fragmentation this condition changes to  $\sum_{\kappa \vdash i'} q_\kappa = 1$  for  $i = 1, \dots, n - 1$ , with  $i'$  as defined  
 662 above. The expressions for the system of differential equations and the projection matrix for general  
 663 mixed strategies (Eqs. (9) and (12)) are changed accordingly. For pure fragmentation modes, the  
 664 projection matrix given in the main text and the characteristic equation given in Eq. (25) remain valid,  
 665 but  $\kappa$  is no longer a partition of  $i + 1$  but of  $i'$  as defined above.

## 666 **H With proportional costs, fragmentation modes are dominated by bi-** 667 **nary splitting**

668 For fragmentation with proportional costs, a group fragmenting into  $\pi$  offspring groups incurs a cost  
 669 of  $\pi - 1$  cells. In this case, similarly to the case for costless fragmentation, nonbinary fragmentation  
 670 modes are dominated by binary fragmentation modes. To prove this, consider (i) positive integers  
 671  $m, j, \text{ and } k$  such that  $m > j + k + 4$ , (ii) an arbitrary partition  $\tau$  with  $\pi \geq 2$  parts such that  
 672  $\tau \vdash m - j - k - \pi - 2$ , and (iii) the following three fragmentation modes:

- 673 1.  $\kappa_1 = j + k + \tau \vdash m - \pi - 1$ , whereby a complex of size  $m$  fragments into one complex of size  
674  $j$ , one complex of size  $k$ , and  $\pi$  complexes given by partition  $\tau$ , and  $\pi + 1$  cells die.
- 675 2.  $\kappa_2 = (j + k + 1) + \tau \vdash m - \pi$ , whereby a complex of size  $m$  fragments into one complex of  
676 size  $j + k + 1$  and  $\pi$  complexes given by partition  $\tau$ , and  $\pi$  cells die.
- 677 3.  $\kappa_3 = j + k \vdash (j + k)$ , a binary fragmentation mode whereby a complex of size  $j + k + 1$   
678 fragments into two offspring complexes (one of size  $j$  and one of size  $k$ ), and one cell dies.

679 Note that fragmentation mode  $\kappa_1$  leads to  $\pi + 2$  offspring groups, fragmentation mode  $\kappa_2$  leads to  $\pi + 1$   
680 offspring groups, and fragmentation mode  $\kappa_3$  leads to a number of offspring groups equal to two. The  
681 rest of the proof is analogous to the one given in Appendix E for the case of costless fragmentation  
682 and will be omitted.

## References

- [1] Godfrey-Smith P. Darwinian populations and natural selection. Oxford University Press; 2009.
- [2] Libby E, Rainey PB. A conceptual framework for the evolutionary origins of multicellularity. *Physical Biology*. 2013;10(3):035002.
- [3] Hammerschmidt K, Rose CJ, Kerr B, Rainey PB. Life cycles, fitness decoupling and the evolution of multicellularity. *Nature*. 2014;515(7525):75–79.
- [4] van Gestel J, Tarnita CE. On the origin of biological construction, with a focus on multicellularity. *Proceedings of the National Academy of Sciences*. 2017;114(42):11018 – 11026.
- [5] Angert ER. Alternatives to binary fission in bacteria. *Nature Reviews Microbiology*. 2005;3(3):214–224.
- [6] Westling-Häggström B, Elmros TH, Normark ST, Winblad B. Growth pattern and cell division in *Neisseria gonorrhoeae*. *Journal of Bacteriology*. 1977;129(1):333–342.
- [7] Koyama T, Yamada M, Matsushashi M. Formation of regular packets of *Staphylococcus aureus* cells. *Journal of Bacteriology*. 1977;129(3):1518 – 1523.

- [8] Keim CN, Martins JL, Abreu F, Rosado AS, de Barros HL, Borojevic R, et al. Multicellular life cycle of magnetotactic prokaryotes. *FEMS Microbiology Letters*. 2004;240(2):203 – 208.
- [9] de la Fuente-Núñez C, Reffuveille F, Fernández L, Hancock REW. Bacterial biofilm development as a multicellular adaptation: antibiotic resistance and new therapeutic strategies. *Current Opinion in Microbiology*. 2013;16(5):580 – 589.
- [10] Boraas ME, Seale DB, Boxhorn JE. Phagotrophy by a flagellate selects for colonial prey: A possible origin of multicellularity. *Evolutionary Ecology*. 1998;12(2):153–164.
- [11] Kapsetaki SE, Fisher RM, West SA. Predation and the formation of multicellular groups in algae. *Evolutionary Ecology Research*. 2016;17(5):651 – 669.
- [12] Bonner JT. Evolutionary strategies and developmental constraints in the cellular slime molds. *The American Naturalist*. 1982;119(4):530 – 552.
- [13] Rainey PB, De Monte S. Resolving conflicts during the evolutionary transition to multicellular life. *Annual Review of Ecology, Evolution, and Systematics*. 2014;45:599 – 620.
- [14] Williams P, Bainton NJ, Swift S, Chhabra SR, Winson MK, Stewart GS, et al. Small molecule-mediated density-dependent control of gene expression in prokaryotes: bioluminescence and the biosynthesis of carbapenem antibiotics. *FEMS microbiology letters*. 1992;100(1-3):161 – 167.
- [15] Diggle SP, Griffin AS, Campbell GS, West SA. Cooperation and conflict in quorum-sensing bacterial populations. *Nature*. 2007;.
- [16] Groebe K, Mueller-Klieser W. On the relation between size of necrosis and diameter of tumor spheroids. *International Journal of Radiation Oncology\*Biophysics*. 1996;34(2):395 – 401.
- [17] Stewart PS, Franklin MJ. Physiological heterogeneity in biofilms. *Nature Reviews Microbiology*. 2008;6(3):199 – 210.
- [18] Tarnita CE, Taubes CH, Nowak MA. Evolutionary construction by staying together and coming together. *Journal of Theoretical Biology*. 2013;320(0):10–22.

- [19] Libby E, Ratcliff WC, Travisano M, Kerr B. Geometry shapes evolution of early multicellularity. *PLoS Computational Biology*. 2014;10(9):e1003803.
- [20] Rashidi A, Shelton DE, Michod RE. A Darwinian approach to the origin of life cycles with group properties. *Theoretical Population Biology*. 2015;102:76 – 84.
- [21] Kaveh K, Veller C, Nowak MA. Games of multicellularity. *Journal of Theoretical Biology*. 2016;403:143 – 158.
- [22] Caswell H. *Matrix population models*. 2nd ed. Sinauer Associates; 2001.
- [23] Andrews GE. *The theory of partitions*. Cambridge, UK: Cambridge University Press; 1998.
- [24] Hofbauer J, Sigmund K. *Evolutionary games and population dynamics*. Cambridge, UK: Cambridge University Press; 1998.
- [25] Cohen JE. Convexity of the dominant eigenvalue of an essentially nonnegative matrix. *Proceedings of the American Mathematical Society*. 1981;81(4):657–658.
- [26] Kirk DL. A twelve step program for evolving multicellularity and a division of labor. *BioEssays*. 2005;27(3):299–310.
- [27] Rossetti V, Filippini M, Svercel M, Barbour AD, Bagheri HC. Emergent multicellular life cycles in filamentous bacteria owing to density-dependent population dynamics. *Journal of The Royal Society Interface*. 2011;8(65):1772–1784. doi:10.1098/rsif.2011.0102.
- [28] Ratcliff WC, Denison RF, Borrello M, Travisano M. Experimental evolution of multicellularity. *Proceedings of the National Academy of Sciences USA*. 2012; p. 1–6.
- [29] Fromhage L, Kokko H. Monogamy and haplodiploidy act in synergy to promote the evolution of eusociality. *Nature Communications*. 2011;2:397.
- [30] De Jaegher K. Harsh environments and the evolution of multi-player cooperation. *Theoretical Population Biology*. 2017;113:1 – 12.
- [31] Hirshleifer J. From weakest-link to best-shot: The voluntary provision of public goods. *Public Choice*. 1983;41(3):371–386.

- [32] Stearns SC. The evolution of life histories. Oxford University Press, Oxford; 1992.
- [33] Roff DA. Life history evolution. Sinauer Associates; 2002.
- [34] Slatkin M. Hedging one's evolutionary bets. *Nature*. 1974;250:704–705.
- [35] Bull JJ. Evolution of phenotypic variance. *Evolution*. 1987;41(2):303–315.
- [36] Cohen D. Optimizing reproduction in a randomly varying environment. *Journal of Theoretical Biology*. 1966;12(1):119 – 129.
- [37] Beaumont HJE, Gallie J, Kost C, Ferguson GC, Rainey PB. Experimental evolution of bet hedging. *Nature*. 2009;462:90–93.
- [38] Michod RE. Evolution of individuality during the transition from unicellular to multicellular life. *Proceedings of the National Academy of Sciences*. 2007;104(Suppl 1):8613 – 8618.
- [39] Grosberg RK, Strathmann RR. One cell, two cell, red cell, blue cell: the persistence of a unicellular stage in multicellular life histories. *Trends in ecology & evolution*. 1998;13(3):112 – 116.
- [40] Herron MD, Rashidi A, Shelton DE, Driscoll WW. Cellular differentiation and individuality in the 'minor' multicellular taxa. *Biological Reviews*. 2013;88(4):844 – 861.
- [41] Maynard Smith J, Szathmáry E. The major transitions in evolution. Oxford: W. H. Freeman; 1995.
- [42] Ratcliff WC, Herron MD, Howell K, Pentz JT, Rosenzweig F, Travisano M. Experimental evolution of an altering uni- and multicellular life cycle in *Chlamydomonas reinhardtii*. *Nature Communications*. 2013;4(2742).
- [43] Roze D, Michod RE. Mutation, multilevel selection, and the evolution of propagule size during the origin of multicellularity. *The American Naturalist*. 2001;158(6):638 – 654.
- [44] Rainey PB, Travisano M. Adaptive radiation in a heterogeneous environment. *Nature*. 1998;394(6688):69–72.



- [45] Anderson CL, Karr TL. Wolbachia: evolutionary novelty in a rickettsial bacteria. *BMC Evolutionary Biology*. 2001;1(1):10.
- [46] Rainey PB, Rainey K. Evolution of cooperation and conflict in experimental bacterial populations. *Nature*. 2003;425(6953):72–74.
- [47] Tautz D, Domazet-Lošo T. The evolutionary origin of orphan genes. *Nature Reviews Genetics*. 2011;12(10):692 – 702.
- [48] Donoghue MT, Keshavaiah C, Swamidatta SH, Spillane C. Evolutionary origins of Brassicaceae specific genes in *Arabidopsis thaliana*. *BMC Evolutionary Biology*. 2011;11(1):47.
- [49] Sabath N, Wagner A, Karlin D. Evolution of viral proteins originated de novo by overprinting. *Molecular biology and evolution*. 2012;29(12):3767–3780.
- [50] Schlotterer C. Genes from scratch—the evolutionary fate of de novo genes. *Trends in Genetics*. 2015;31(4):215 – 219.
- [51] Farr AD, Remigi P, Rainey PB. Adaptive evolution by spontaneous domain fusion and protein relocalisation. *Nature Ecology and Evolution*. 2017;1:1562-1568.
- [52] Hammerstein P. Darwinian adaptation, population genetics and the streetcar theory of evolution. *Journal of Mathematical Biology*. 1996;34(5-6):511–532.
- [53] Stephen Boyd and Lieven Vandenberghe. *Convex optimization*. Cambridge university press, 2004.
